# Supplementary material for: New insights into structure/optical waveguide behavior relationships in linear bisethynylbenzenes
Source: Royal Society of Chemistry journal article supplement (doi:10.1039/d2tc00173j), 2022-01-01
Supplement: d2tc00173j1.pdf [file d2tc00173j1.pdf]

## **New insights about structure/optical waveguide behavior relationships in linear bisethynylbenzenes**

Carlos Tardío<sup>a</sup>, Javier Álvarez-Conde<sup>b</sup>, Iván Torres-Moya<sup>a</sup>, Ana M. Rodríguez<sup>a</sup>, Antonio de la Hoz<sup>a\*</sup>, Juan Cabanillas-Gonzalez<sup>b\*</sup>, Pilar Prieto<sup>a\*</sup>.

a) Department of Inorganic, Organic Chemistry and Biochemistry, Faculty of Chemical Science and Technologies, University of Castilla-La Mancha-IRICA, 13071, Ciudad Real, Spain. e-mail: MariaPilar.Prieto@uclm.es; Antonio.Hoz@uclm.es

b) Madrid Institute for Advanced Studies, IMDEA Nanociencia, Calle Faraday 9, Ciudad Universitaria de Cantoblanco, Madrid 28049, Spain. e-mail: Juan.Cabanillas@imdea.org

### **Supplementary information**

|                              |    |
|------------------------------|----|
| 1. Experimental section      | 2  |
| 1.1. General techniques      | 2  |
| 1.2. Experimental procedures | 3  |
| 2. PL in solid state         | 8  |
| 3. Computational study       | 8  |
| 4. SEM images                | 20 |
| 5. X-Ray diffraction studies | 22 |
| 6. NMR spectra               | 35 |
| 7. References                | 48 |

## 1. Experimental section

### 1.1. General techniques

All reagents were used as purchased. Reaction with air-sensitive materials were carried out under an argon atmosphere. Microwave irradiations were performed in a Discover® (CEM) focused microwave reactor. Flash chromatography was carried out using silica gel (Merck, Kieselgel 60, 230-240 mesh or Scharlau 60, 230-240 mesh). Analytical thin layer chromatography (TLC) was performed using aluminium-coated Merck Kieselgel 60 F254 plates.

<sup>1</sup>H NMR and <sup>13</sup>C NMR spectra were recorded on Bruker Avance Neo NMR spectrometers operating at 399.77 and 500.16 MHz for <sup>1</sup>H and 100.53 and 125.75 MHz for <sup>13</sup>C, respectively. All spectra were performed at 298 K using partially deuterated solvents as internal reference. Coupling constants (J) are denoted in hertz (Hz) and chemical shifts (δ) in ppm. Multiplicities are denoted as: s = singlet, d = doublet, t = triplet, q = quadruplet, quint = quintuplet, sext = sextet and m = multiplet.

UV–visible and fluorescence spectroscopy studies in solution state were conducted on a Jasco V-750 spectrophotometer and Jasco FP-8300 spectrofluorometer, respectively. The absorption and emission spectra were recorded in chloroform at concentration of 10<sup>-5</sup> M at room temperature using standard quart cells of 1 cm width and solvents of spectroscopic grade.

The melting points of the solid products were determined using a Büchi model M-569 melting point meter.

MALDI-TOF mass spectra were obtained on a Bruker Autoflex II TOF/TOF spectrometer employing dithranol as matrix. Samples, co-crystallized with the matrix on the probe, were ionized with a nitrogen laser pulse (337 nm) and accelerated under 20 kV with time-delayed extraction before entering the time-of-flight mass spectrometer. Matrix (10 mg/mL) and sample (1 mg/mL) were separately dissolved in tetrahydrofuran and mixed in a matrix/sample ratio ranging from 100:1 to 50:1. Typically, a 5 μL mixture of matrix and sample was applied to a MALDI-TOF MS probe and air-dried. MALDI-TOF MS in positive reflector mode was used for all samples. External calibration was performed by using Peptide Calibration Standard II (covered mass range: 700–3200 Da) from Care (Bruker). The applied peak (m/z determination) detection method was the threshold centroid at 50% height of the peak maximum.

SEM images were obtained by a HRSEM Zeiss GeminiSEM 500 operating at 3 kV. The corresponding crystal, obtained by slow diffusion, was deposited onto a glass substrate and the remaining solvent was slowly evaporated.

X-ray diffraction data were collected on a Bruker X8 APEX II CCD-based diffractometer, equipped with a graphite monochromated MoK $\alpha$  radiation source ( $\lambda = 0.71073 \text{ \AA}$ ). Data were integrated using SAINT<sup>1</sup> and an absorption correction was performed with the program SADABS.<sup>2</sup> The structure was solved by a combination of direct methods and difference Fourier syntheses and refined by full-matrix least-squares on F2 with the WINGX and OLEX2 software packages.<sup>3-5</sup> All non-hydrogen atoms were refined with anisotropic thermal parameters. Hydrogen atoms were placed using a “riding model” and included in the refinement at calculated positions.

PL microscopy images were acquired with a Nikon Eclipse Ti inverted microscope with dry objectives (100X N.A. 0.8 and 20X N.A. 0.45) coupled to a Shamrock spectrometer from Andor Technology with a thermoelectrically cooled Newton EM (Andor) CCD. The excitation was obtained by appropriate filtering of the lines from a Xe lamp.

Loss coefficients in fibres were obtained upon exciting the fibres with a pulsed Nd:YAG laser (355 nm, 300 ps, 1 KHz, 30  $\mu\text{J/pulse}$ ). A set of filters were employed to attenuate the photoexcitation. Detection from the fibre edge was focused in free space on to a 0.5 m length SP2558 Princeton Instruments (Acton Research) spectrometer equipped with a 600 lines/mm grating and a liquid nitrogen cooled CCD.

## 1.2 Experimental procedures

**3b-e**, **4a** and **6** are commercially available and were used without further purification. Dibromobenzene **5** was synthesized as described by Devic and col.<sup>6</sup> From **3b-e**, the arylethynylstannanes **4b-e** were synthesized as previously reported.<sup>7</sup>

### - General procedure for the synthesis of derivatives **4**

n-BuLi was added dropwise to a solution of the corresponding acetylene derivative (**3b-e**) in dry THF (-78 °C) under inert atmosphere. The mixture was stirred for 30 min. and then Bu<sub>3</sub>SnCl was added dropwise. The reaction mixture was carried out to room temperature and stirred for 2 h. Then water (30 mL) was added to the crude reaction, neutralized with HCl 1M and the organic layers were extracted with dichloromethane

(3x30 mL). The organic layers were dried with MgSO<sub>4</sub>, the solvent was removed in vacuo and the product was employed in the next step without previous purification.

- Tributyl((2-(trifluoromethyl)phenyl)ethynyl)stannane (**4b**)

From 1-ethynyl-2-(trifluoromethyl)benzene (**3b**) (0.5 g, 2.94 mmol), n-BuLi (2.75 mL, 4.41 mmol) and Bu<sub>3</sub>SnCl (0.96 mL, 3.52 mmol), a brown liquid was obtained (1.28 g, 95%). <sup>1</sup>H-NMR (CDCl<sub>3</sub>, 400 MHz, ppm) δ: 7.59 (t, *J* = 7.6 Hz, 2H) 7.43 (t, *J* = 7.6 Hz, 1H), 7.33 (t, *J* = 7.6 Hz, 1H), 1.62 (quint, *J* = 7.0 Hz, 6H), 1.37 (sext, *J* = 7.2 Hz, 6H), 1.07 (t, *J* = 8.0 Hz, 6H), 0.92 (t, *J* = 7.2 Hz, 9H).

- Tributyl((2-methoxyphenyl)ethynyl)stannane (**4c**)

From 1-ethynyl-2-methoxybenzene (**3c**) (0.5 g, 3.78 mmol), n-BuLi (3.55 mL, 5.67 mmol) and Bu<sub>3</sub>SnCl (1.23 mL, 4.54 mmol), a yellow liquid was obtained (1.40 g, 88%). <sup>1</sup>H-NMR (CDCl<sub>3</sub>, 400 MHz, ppm) δ: 7.41 (dd, *J* = 7.6, 1.6 Hz, 1H), 7.21 (td, *J* = 8.4, 1.6 Hz, 1H), 6.84 (m, 2H), 3.86 (s, 3H), 1.63 (quint, *J* = 7.6 Hz, 6H), 1.38 (sext, *J* = 7.6 Hz, 6H), 1.06 (t, *J* = 8 Hz, 6H), 0.92 (t, *J* = 7.6 Hz, 9H).

- Tributyl((4-(trifluoromethyl)phenyl)ethynyl)stannane (**4d**)

From 1-ethynyl-4-(trifluoromethyl)benzene (**3d**) (0.5 g, 2.94 mmol), n-BuLi (2.75 mL, 4.41 mmol) and Bu<sub>3</sub>SnCl (0.96 mL, 3.52 mmol), a yellow liquid was obtained (1.24 g, 92%). <sup>1</sup>H-NMR (CDCl<sub>3</sub>, 400 MHz, ppm) δ: 7.53 (bs, 4H), 1.61 (quint, *J* = 7.6 Hz, 6H), 1.37 (sext, *J* = 7.6 Hz, 6H), 1.05 (t, *J* = 7.6 Hz, 6H), 0.92 (t, *J* = 7.6 Hz, 9H).

- Tributyl((4-methoxyphenyl)ethynyl)stannane (**4e**)

From 1-ethynyl-4-methoxybenzene (**3e**) (0.5 g, 3.78 mmol), n-BuLi (3.55 mL, 5.67 mmol) and Bu<sub>3</sub>SnCl (1.23 mL, 4.54 mmol), a yellow liquid was obtained (1.35 g, 85%). <sup>1</sup>H-NMR (CDCl<sub>3</sub>, 400 MHz, ppm) δ: 7.38 (d, *J* = 8.8 Hz, 2H), 6.80 (d, *J* = 8.8 Hz, 2H), 3.78 (s, 3H), 1.62 (quint, *J* = 7.6 Hz, 6H), 1.37 (sext, *J* = 7.2 Hz, 6H), 1.05 (t, *J* = 7.6 Hz, 6H), 0.92 (t, *J* = 7.2 Hz, 9H).

- General procedure for the synthesis of derivatives **1a-e**

A mixture of 1,4-dibromo-2,5-bis(trifluoromethyl)benzene (**5**) (0.100 g, 0.27 mmol), the corresponding ethynylstannane **4** (0.69 mmol), PdCl<sub>2</sub>(PPh<sub>3</sub>)<sub>2</sub> (0.007 g, 0.01 mmol) and

LiCl (0.035 g, 0.08 mmol) was charged under inert atmosphere to a microwave vessel. CH<sub>3</sub>CN (1 mL) was added, and the vessel was closed and irradiated at 110 °C for 20 min. The crude reaction was purified by column chromatography on silica gel, eluting with hexane/ethyl acetate to afford the pure products **1a-e**.

- 1,4-bis(phenylethynyl)-2,5-bis(trifluoromethyl)benzene (**1a**)

From tributyl(phenylethynyl)stannane (**4a**) (0.274 g, 0.69 mmol), **1a** was obtained as white solid (0.080 g, 72%) by chromatography, eluting with hexane. M. p.: 145-147 °C. <sup>1</sup>H-NMR (CDCl<sub>3</sub>, 400 MHz, ppm) δ: 7.96 (s, 2H), 7.57 (m, 4H), 7.40 (m, 6H). <sup>13</sup>C-NMR (CDCl<sub>3</sub>, 100 MHz, ppm) δ: 134.2 (q, *J*<sub>C-F</sub>= 31.32 Hz), 132.5, 131.9, 131.3 (q, *J*<sub>C-F</sub>= 5.2 Hz), 129.5, 128.5, 122.6 (q, *J*<sub>C-F</sub>= 272.3 Hz), 122.0, 98.4, 84.3. MS calcd for (C<sub>24</sub>H<sub>12</sub>F<sub>6</sub>) M<sup>+</sup> 414.0843, found 414.2806.

- 1,4-bis(2-trifluoromethylphenylethynyl)-2,5-bis(trifluoromethyl)benzene (**1b**)

From tributyl(2-trifluoromethylphenylethynyl)stannane (**4b**) (0.322 g, 0.69 mmol), **1b** was obtained as pale yellow solid (0.064 g, 43%) by chromatography, eluting with hexane/ethyl acetate 20:1. M. p.: 176-178 °C. <sup>1</sup>H-NMR (CDCl<sub>3</sub>, 400 MHz, ppm) δ: 7.98 (s, 2H), 7.73 (d, *J*= 8.1 Hz, 4H), 7.58 (t, *J*= 7.6 Hz, 2H), 7.50 (t, *J*= 7.6 Hz, 2H). <sup>13</sup>C-NMR (CDCl<sub>3</sub>, 100 MHz, ppm) δ: 134.5, 134.3 (q, *J*<sub>C-F</sub>= 31.3 Hz), 131.9 (q, *J*<sub>C-F</sub>= 5.1 Hz), 131.8 (q, *J*<sub>C-F</sub>= 31.0 Hz), 131.6, 129.3, 126.1 (q, *J*<sub>C-F</sub>= 5.0 Hz), 123.3 (q, *J*<sub>C-F</sub>= 273.5 Hz), 122.3 (q, *J*<sub>C-F</sub>= 271.3 Hz), 121.6, 120.0, 94.0, 89.1. MS calcd for (C<sub>26</sub>H<sub>10</sub>F<sub>12</sub>) M<sup>+</sup> 550.0590, found 550.2815.

- 1,4-bis(2-methoxyphenylethynyl)-2,5-bis(trifluoromethyl)benzene (**1c**)

From tributyl(2-methoxyphenylethynyl)stannane (**4c**) (0.295 g, 0.69 mmol), **1c** was obtained as yellow solid (0.090 g, 70%) by chromatography, eluting with hexane/ethyl acetate 20:1. M. p.: 178-180 °C. <sup>1</sup>H-NMR (CDCl<sub>3</sub>, 400 MHz, ppm) δ: 7.97 (s, 2H), 7.51 (dd, *J*= 7.6, 1.6 Hz, 2H), 7.37 (td, *J*= 8.4, 1.6 Hz, 2H), 6.97 (td, *J*= 7.2, 1.2 Hz, 2H), 6.93 (d, *J*= 8.4 Hz, 2H), 3.93 (s, 6H). <sup>13</sup>C-NMR (CDCl<sub>3</sub>, 100 MHz, ppm) δ: 160.5, 133.9 (q, *J*<sub>C-F</sub>= 30.0 Hz), 133.8, 131.3 (q, *J*<sub>C-F</sub>= 5.2 Hz), 131.0, 122.7 (q, *J*<sub>C-F</sub>= 270.0 Hz), 121.3, 120.6, 111.4, 110.9, 95.1, 88.3, 55.9. MS calcd for (C<sub>26</sub>H<sub>16</sub>F<sub>6</sub>O<sub>2</sub>) M<sup>+</sup> 474.1054, found 474.3297.

- 1,4-bis(4-trifluoromethylphenylethynyl)-2,5-bis(trifluoromethyl)benzene (**1d**)

From tributyl(4-trifluoromethylphenylethynyl)stannane (**4d**) (0.322 g, 0.69 mmol), **1d** was obtained as white solid (0.070 g, 47%) by chromatography, eluting with hexane. M. p.: 197-199 °C. <sup>1</sup>H-NMR (CDCl<sub>3</sub>, 400 MHz, ppm) δ: 8.00 (s, 2H), 7.67 (AA'BB' *J*= 8.8 Hz, 8H). <sup>13</sup>C-NMR (CDCl<sub>3</sub>, 125 MHz, ppm) δ: 134.5 (q, *J*<sub>C-F</sub>= 31.6 Hz), 132.1, 131.5 (q, *J*<sub>C-F</sub>= 5.2 Hz), 131.2 (q, *J*<sub>C-F</sub>= 32.3 Hz), 125.5 (q, *J*<sub>C-F</sub>= 4.0 Hz), 123.7 (q, *J*<sub>C-F</sub>= 270.5 Hz), 122.4 (q, *J*<sub>C-F</sub>= 272.4 Hz), 121.1, 96.8, 86.1. MS calcd for (C<sub>26</sub>H<sub>10</sub>F<sub>12</sub>) M<sup>+</sup> 550.0590, found 550.2367.

- 1,4-bis(4-methoxyphenylethynyl)-2,5-bis(trifluoromethyl)benzene (**1e**)

From tributyl(4-methoxyphenylethynyl)stannane (**4e**) (0.295 g, 0.69 mmol), **1e** was obtained as yellow solid (0.085 g, 63%) by chromatography, eluting with hexane/ethyl acetate 20:1. M. p.: 180-181 °C. <sup>1</sup>H-NMR (CDCl<sub>3</sub>, 500 MHz, ppm) δ: 7.91 (s, 2H), 7.51 (d, *J*= 8.5 Hz, 4H), 6.91 (d, *J*= 8.5 Hz, 4H), 3.85 (s, 6H). <sup>13</sup>C-NMR (CDCl<sub>3</sub>, 125 MHz, ppm) δ: 160.6, 133.7 (q, *J*<sub>C-F</sub>= 31.1 Hz), 133.5, 131.0 (q, *J*<sub>C-F</sub>= 5.2 Hz), 122.7 (q, *J*<sub>C-F</sub>= 272.7 Hz), 121.1, 114.2, 114.1, 98.6, 83.5, 55.4. MS calcd for (C<sub>26</sub>H<sub>16</sub>F<sub>6</sub>O<sub>2</sub>) M<sup>+</sup> 474.1054, found 474.3210.

- General procedure for the synthesis of derivatives **2a-e**

A mixture of 1,4-dibromo-2,5-bis(methoxy)benzene (**6**) (0.100 g, 0.34 mmol), the corresponding ethynylstannane **4a-e** (0.87 mmol), PdCl<sub>2</sub>(PPh<sub>3</sub>)<sub>2</sub> (0.010 g, 0.013 mmol) and LiCl (0.043 g, 1.01 mmol) was charged under an inert atmosphere to a microwave vessel. CH<sub>3</sub>CN (1 mL) was added, and the vessel was closed and irradiated at 110 °C for 20 min. The crude reaction was purified by column chromatography on silica gel, eluting with hexane/ethyl acetate to afford the pure products **2a-e**.

- 1,4-bis(phenylethynyl)-2,5-dimethoxybenzene (**2a**)

From tributyl(phenylethynyl)stannane (**4a**) (0.343 g, 0.87 mmol), **2a** was obtained as yellow solid (0.080 g, 70%) by chromatography, eluting with hexane/ethyl acetate 20:1. M. p.: 175-177 °C. <sup>1</sup>H-NMR (CDCl<sub>3</sub>, 500 MHz, ppm) δ: 7.57 (dd, *J*= 7.9, 2.4, 4H), 7.35 (m, 6H), 7.04 (s, 2H), 3.91 (s, 6H). <sup>13</sup>C-NMR (CDCl<sub>3</sub>, 100 MHz, ppm) δ: 153.9, 131.7, 128.4, 128.3, 123.2, 115.7, 113.4, 95.0, 85.6, 56.5. MS calcd for (C<sub>24</sub>H<sub>18</sub>O<sub>2</sub>) M<sup>+</sup> 338.1307, found 338.3123.

- 1,4-bis(2-trifluoromethylphenylethynyl)-2,5-dimethoxybenzene (**2b**)

From tributyl(2-trifluoromethylphenylethynyl)stannane (**4b**) (0.404 g, 0.87 mmol), **2b** was obtained as white solid (0.092 g, 60%) by chromatography, eluting with hexane/ethyl acetate 9:1. M. p.: 123-124 °C. <sup>1</sup>H-NMR (CDCl<sub>3</sub>, 400 MHz, ppm) δ: 7.70 (t, *J* = 8.6 Hz, 4H), 7.52 (t, *J* = 7.6 Hz, 2H), 7.42 (t, *J* = 7.7 Hz, 2H), 7.03 (s, 2H), 3.91 (s, 6H). <sup>13</sup>C-NMR (CDCl<sub>3</sub>, 125 MHz, ppm) δ: 154.3, 133.9, 131.4 (q, *J*<sub>C-F</sub> = 30.3 Hz) 131.3, 128.1, 125.9 (q, *J*<sub>C-F</sub> = 5.2 Hz), 123.6 (q, *J*<sub>C-F</sub> = 271.9 Hz), 121.5, 115.9, 113.7, 91.3, 91.0, 56.3. MS calcd for (C<sub>26</sub>H<sub>16</sub>F<sub>6</sub>O<sub>2</sub>) M<sup>+</sup> 474.1054, found 474.2917.

- 1,4-bis(2-methoxyphenylethynyl)-2,5-dimethoxybenzene (**2c**)

From tributyl(2-methoxyphenylethynyl)stannane (**4c**) (0.370 g, 0.87 mmol), **2c** was obtained as white solid (0.103 g, 77%) by chromatography, eluting with hexane/ethyl acetate 6:1. M. p.: 125-127 °C. <sup>1</sup>H-NMR (CDCl<sub>3</sub>, 400 MHz, ppm) δ: 7.53 (dd, *J* = 7.6, 1.7 Hz, 2H), 7.31 (td, *J* = 7.5, 1.7 Hz, 2H), 7.06 (s, 2H), 6.94 (td *J* = 7.6, 0.8 Hz, 2H), 6.91 (d *J* = 8.4 Hz, 2H), 3.94 (s, 6H), 3.91 (s, 6H). <sup>13</sup>C-NMR (CDCl<sub>3</sub>, 125 MHz, ppm) δ: 159.9, 153.9, 133.6, 129.9, 120.4, 115.6, 113.5, 112.4, 110.6, 91.4, 89.8, 56.6, 55.9. MS calcd for (C<sub>26</sub>H<sub>22</sub>O<sub>4</sub>) M<sup>+</sup> 398.1518, found 398.4101.

- 1,4-bis(4-trifluoromethylphenylethynyl)-2,5-dimethoxybenzene (**2d**)

From tributyl(4-(trifluoromethyl)phenylethynyl)stannane (**4d**) (0.404 g, 0.87 mmol), **2d** was obtained as yellow solid (0.093 g, 63%) by chromatography, eluting with hexane/ethyl acetate 20:1. M. p.: 172-174 °C. <sup>1</sup>H-NMR (CDCl<sub>3</sub>, 400 MHz, ppm) δ: 7.64 (AA'BB', *J* = 8.2 Hz, 8H), 7.06 (s, 2H), 3.92 (s, 6H). <sup>13</sup>C-NMR (CDCl<sub>3</sub>, 100 MHz, ppm) δ: 154.1, 131.9, 130.1 (q, *J*<sub>C-F</sub> = 32.5 Hz), 127.0, 125.3 (q, *J*<sub>C-F</sub> = 3.9 Hz), 123.9 (q, *J*<sub>C-F</sub> = 270.6 Hz) 115.7, 113.3, 93.8, 87.9, 56.5. MS calcd for (C<sub>26</sub>H<sub>16</sub>F<sub>6</sub>O<sub>2</sub>) M<sup>+</sup> 474.1054, found 474.3445.

- 1,4-bis(4-methoxyphenylethynyl)-2,5-dimethoxybenzene (**2e**)

From tributyl(4-methoxyphenylethynyl)stannane (**4e**) (0.370 g, 0.87 mmol), **2e** was obtained as yellow solid (0.085 g, 63%) by chromatography, eluting with hexane/ethyl acetate 6:1. M. p.: 165-166 °C. <sup>1</sup>H-NMR (CDCl<sub>3</sub>, 400 MHz, ppm) δ: 7.51 (d, *J* = 8.8 Hz, 4H), 7.01 (s, 2H), 6.88 (d, *J* = 8.8 Hz, 4H), 3.90 (s, 6H), 3.84 (s, 6H). <sup>13</sup>C-NMR (CDCl<sub>3</sub>, 125 MHz, ppm) δ: 159.7, 153.8, 133.2, 115.5, 115.4, 114.0, 113.3, 95.0, 84.4, 56.5, 55.3. MS calcd for (C<sub>26</sub>H<sub>22</sub>O<sub>4</sub>) M<sup>+</sup> 398.1518, found 398.5129.

## 2. PL in solid state

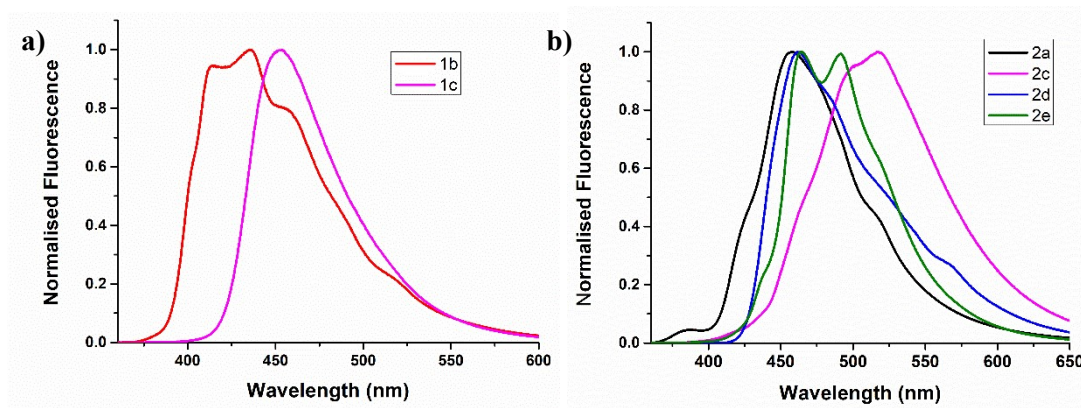

**Figure S1:** PL spectra of derivatives a) **1** and b) **2** in solid state.

## 3. Computational study

Computational calculations were carried out by means of Gaussian 16 software.<sup>8</sup> The calculations were performed within the Density Functional Theory (DFT) framework.<sup>9</sup> Geometry optimizations were carried out using the B3LYP<sup>10</sup> functional and the medium-sized 6-31G (d,p) basis set as implemented in the Gaussian 16 program. Solvent effects were estimated using the polarizable continuum model<sup>11</sup> (PCM) within the self-consistent reaction field (SCRF) approach using chloroform ( $\epsilon = 4.7113$ ) as solvent.

**Table S1:** Topologies of the HOMO-LUMO molecular orbitals and the HOMO-LUMO gap value calculated at B3LYP/6-31G(d,p) according to the CPCM method employing chloroform as solvent for derivatives **1** and **2**.

| Compound                                                                                         | HOMO (eV) | LUMO (eV) | HOMO-LUMO gap (eV) |
|--------------------------------------------------------------------------------------------------|-----------|-----------|--------------------|
| 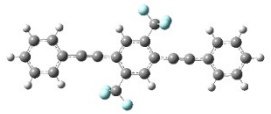<br><b>1a</b> | -5.87     | -2.35     | 3.52               |
| <br><b>1b</b> | -6.10     | -2.59     | 3.51               |
| <br><b>1c</b> | -5.72     | -2.29     | 3.43               |



|                                                                                                  |                                                                                             |                                                                                              |      |
|--------------------------------------------------------------------------------------------------|---------------------------------------------------------------------------------------------|----------------------------------------------------------------------------------------------|------|
| 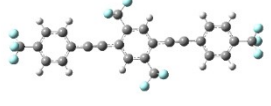<br><b>1d</b>   | <br>-6.15  | <br>-2.62  | 3.53 |
| <br><b>1e</b>   | <br>-5.48  | <br>-2.18  | 3.30 |
| <br><b>2a</b>   | <br>5.58   | <br>1.92   | 3.66 |
| <br><b>2b</b>   | <br>-5.81  | <br>-2.15  | 3.66 |
| <br><b>2c</b>   | <br>-5.36  | <br>-1.82  | 3.54 |
| <br><b>2d</b>  | <br>-5.83 | <br>-2.24 | 3.59 |
| <br><b>2e</b> | <br>5.26 | <br>1.74 | 3.52 |

**Table S2:** Cartesian coordinates for optimized geometry of **1a**

Standard orientation:

| Center Number | Atomic Number | Atomic Type | Coordinates (Angstroms) |           |           |
|---------------|---------------|-------------|-------------------------|-----------|-----------|
|               |               |             | X                       | Y         | Z         |
| 1             | 6             | 0           | 0.770332                | 1.168735  | -0.000136 |
| 2             | 6             | 0           | -0.614601               | 1.247077  | -0.000136 |
| 3             | 6             | 0           | -1.418841               | 0.090944  | -0.000044 |
| 4             | 6             | 0           | -0.770310               | -1.168372 | 0.000049  |
| 5             | 6             | 0           | 0.614623                | -1.246714 | 0.000049  |
| 6             | 6             | 0           | 1.418862                | -0.090581 | -0.000043 |
| 7             | 1             | 0           | -1.096465               | 2.216144  | -0.000208 |
| 8             | 1             | 0           | 1.096487                | -2.215782 | 0.000120  |
| 9             | 6             | 0           | 2.832056                | -0.219167 | -0.000044 |
| 10            | 6             | 0           | -2.832035               | 0.219537  | -0.000048 |
| 11            | 6             | 0           | -4.043129               | 0.335305  | -0.000050 |
| 12            | 6             | 0           | 4.043146                | -0.334984 | -0.000039 |
| 13            | 6             | 0           | 5.463761                | -0.424969 | 0.000021  |
| 14            | 6             | 0           | 6.109087                | -1.678207 | 0.000197  |

|    |   |   |           |           |           |
|----|---|---|-----------|-----------|-----------|
| 15 | 6 | 0 | 6.241861  | 0.751442  | -0.000101 |
| 16 | 6 | 0 | 7.499500  | -1.747470 | 0.000250  |
| 17 | 6 | 0 | 7.631198  | 0.670061  | -0.000046 |
| 18 | 1 | 0 | 5.742968  | 1.714961  | -0.000238 |
| 19 | 6 | 0 | 8.263378  | -0.576837 | 0.000129  |
| 20 | 1 | 0 | 7.988928  | -2.716513 | 0.000386  |
| 21 | 1 | 0 | 8.222827  | 1.580302  | -0.000142 |
| 22 | 6 | 0 | -5.463773 | 0.424853  | 0.000004  |
| 23 | 6 | 0 | -6.241517 | -0.751794 | 0.000152  |
| 24 | 6 | 0 | -6.109477 | 1.677895  | -0.000091 |
| 25 | 6 | 0 | -7.630879 | -0.670834 | 0.000204  |
| 26 | 1 | 0 | -5.742334 | -1.715163 | 0.000225  |
| 27 | 6 | 0 | -7.499911 | 1.746737  | -0.000038 |
| 28 | 6 | 0 | -8.263435 | 0.575873  | 0.000109  |
| 29 | 1 | 0 | -8.222233 | -1.581254 | 0.000319  |
| 30 | 1 | 0 | -7.989632 | 2.715631  | -0.000112 |
| 31 | 6 | 0 | 1.585036  | 2.440222  | -0.000232 |
| 32 | 6 | 0 | -1.585013 | -2.439860 | 0.000146  |
| 33 | 9 | 0 | 0.803246  | 3.541291  | -0.000324 |
| 34 | 9 | 0 | 2.385323  | 2.522076  | 1.086186  |
| 35 | 9 | 0 | 2.385338  | 2.521905  | -1.086653 |
| 36 | 9 | 0 | -2.385310 | -2.521545 | 1.086569  |
| 37 | 9 | 0 | -0.803220 | -3.540927 | 0.000235  |
| 38 | 9 | 0 | -2.385302 | -2.521715 | -1.086271 |
| 39 | 1 | 0 | -5.512782 | 2.584051  | -0.000205 |
| 40 | 1 | 0 | 5.512118  | -2.584182 | 0.000290  |
| 41 | 1 | 0 | -9.347506 | 0.634682  | 0.000150  |
| 42 | 1 | 0 | 9.347431  | -0.635974 | 0.000171  |

**Table S3:** Cartesian coordinates for optimized geometry of **1b**

Standard orientation:

| Center<br>Number | Atomic<br>Number | Atomic<br>Type | Coordinates (Angstroms) |           |           |
|------------------|------------------|----------------|-------------------------|-----------|-----------|
|                  |                  |                | X                       | Y         | Z         |
| 1                | 6                | 0              | 0.469041                | 1.319936  | 0.000012  |
| 2                | 6                | 0              | -0.894435               | 1.066294  | 0.000015  |
| 3                | 6                | 0              | -1.395357               | -0.249857 | 0.000018  |
| 4                | 6                | 0              | -0.469049               | -1.319946 | 0.000015  |
| 5                | 6                | 0              | 0.894426                | -1.066304 | 0.000011  |
| 6                | 6                | 0              | 1.395348                | 0.249847  | 0.000010  |
| 7                | 1                | 0              | -1.597556               | 1.889216  | 0.000017  |
| 8                | 1                | 0              | 1.597548                | -1.889225 | 0.000010  |
| 9                | 6                | 0              | 2.799890                | 0.450240  | 0.000007  |
| 10               | 6                | 0              | -2.799898               | -0.450255 | 0.000021  |
| 11               | 6                | 0              | -4.009550               | -0.566927 | 0.000034  |
| 12               | 6                | 0              | 4.009544                | 0.566899  | 0.000013  |
| 13               | 6                | 0              | 5.420455                | 0.745997  | -0.000017 |
| 14               | 6                | 0              | 6.318656                | -0.349433 | -0.000020 |
| 15               | 6                | 0              | 5.945647                | 2.052079  | -0.000041 |
| 16               | 6                | 0              | 7.693069                | -0.124207 | -0.000047 |
| 17               | 6                | 0              | 7.321491                | 2.264066  | -0.000069 |
| 18               | 1                | 0              | 5.256748                | 2.889602  | -0.000038 |

|    |   |   |           |           |           |
|----|---|---|-----------|-----------|-----------|
| 19 | 6 | 0 | 8.197179  | 1.177946  | -0.000072 |
| 20 | 1 | 0 | 8.369849  | -0.969977 | -0.000049 |
| 21 | 1 | 0 | 7.708401  | 3.277946  | -0.000088 |
| 22 | 1 | 0 | 9.270031  | 1.339135  | -0.000093 |
| 23 | 6 | 0 | -5.420464 | -0.745999 | 0.000010  |
| 24 | 6 | 0 | -5.945676 | -2.052073 | 0.000009  |
| 25 | 6 | 0 | -6.318650 | 0.349444  | -0.000009 |
| 26 | 6 | 0 | -7.321522 | -2.264042 | -0.000011 |
| 27 | 1 | 0 | -5.256787 | -2.889606 | 0.000025  |
| 28 | 6 | 0 | -7.693066 | 0.124237  | -0.000029 |
| 29 | 6 | 0 | -8.197195 | -1.177908 | -0.000031 |
| 30 | 1 | 0 | -7.708446 | -3.277916 | -0.000012 |
| 31 | 1 | 0 | -8.369834 | 0.970016  | -0.000043 |
| 32 | 1 | 0 | -9.270049 | -1.339083 | -0.000047 |
| 33 | 6 | 0 | 5.788657  | -1.760754 | 0.000009  |
| 34 | 6 | 0 | -5.788630 | 1.760756  | -0.000007 |
| 35 | 9 | 0 | 6.782639  | -2.675091 | -0.000001 |
| 36 | 9 | 0 | 5.020004  | -2.012306 | 1.085824  |
| 37 | 9 | 0 | 5.019956  | -2.012334 | -1.085765 |
| 38 | 9 | 0 | -5.019963 | 2.012314  | 1.085796  |
| 39 | 9 | 0 | -5.019935 | 2.012306  | -1.085792 |
| 40 | 9 | 0 | -6.782598 | 2.675109  | -0.000022 |
| 41 | 6 | 0 | 0.962175  | 2.747317  | 0.000012  |
| 42 | 6 | 0 | -0.962184 | -2.747326 | 0.000017  |
| 43 | 9 | 0 | -0.055651 | 3.632824  | 0.000011  |
| 44 | 9 | 0 | 1.721869  | 3.011698  | 1.086310  |
| 45 | 9 | 0 | 1.721871  | 3.011697  | -1.086285 |
| 46 | 9 | 0 | -1.721878 | -3.011706 | 1.086315  |
| 47 | 9 | 0 | 0.055642  | -3.632834 | 0.000015  |
| 48 | 9 | 0 | -1.721881 | -3.011707 | -1.086279 |

**Table S4:** Cartesian coordinates for optimized geometry of **1c**

Standard orientation:

| Center<br>Number | Atomic<br>Number | Atomic<br>Type | Coordinates (Angstroms) |           |           |
|------------------|------------------|----------------|-------------------------|-----------|-----------|
|                  |                  |                | X                       | Y         | Z         |
| 1                | 6                | 0              | 0.699986                | 1.518871  | -0.010887 |
| 2                | 6                | 0              | -0.686993               | 1.537293  | 0.000118  |
| 3                | 6                | 0              | -1.442404               | 0.348919  | 0.036669  |
| 4                | 6                | 0              | -0.739013               | -0.880211 | 0.068590  |
| 5                | 6                | 0              | 0.648043                | -0.899369 | 0.057286  |
| 6                | 6                | 0              | 1.403056                | 0.289124  | 0.015058  |
| 7                | 1                | 0              | -1.209854               | 2.484603  | -0.023119 |
| 8                | 1                | 0              | 1.171441                | -1.846273 | 0.082676  |
| 9                | 6                | 0              | 2.819076                | 0.220608  | 0.001801  |
| 10               | 6                | 0              | -2.860434               | 0.429447  | 0.037628  |
| 11               | 6                | 0              | -4.071922               | 0.542810  | 0.026318  |
| 12               | 6                | 0              | 4.034170                | 0.153664  | -0.010530 |
| 13               | 6                | 0              | 5.453491                | 0.150759  | -0.028029 |
| 14               | 6                | 0              | 6.159726                | 1.367684  | -0.072708 |
| 15               | 6                | 0              | 7.579118                | -1.041866 | -0.020229 |

|    |   |   |           |           |           |
|----|---|---|-----------|-----------|-----------|
| 16 | 6 | 0 | 7.550650  | 1.387579  | -0.091098 |
| 17 | 1 | 0 | 5.590426  | 2.291201  | -0.092669 |
| 18 | 6 | 0 | 8.252765  | 0.181016  | -0.064664 |
| 19 | 1 | 0 | 8.147067  | -1.963563 | -0.000586 |
| 20 | 1 | 0 | 8.081523  | 2.332951  | -0.125715 |
| 21 | 1 | 0 | 9.338478  | 0.183249  | -0.078634 |
| 22 | 6 | 0 | -5.487511 | 0.684969  | 0.030852  |
| 23 | 6 | 0 | -6.085770 | 1.891759  | 0.449439  |
| 24 | 6 | 0 | -7.469131 | 2.037047  | 0.448721  |
| 25 | 1 | 0 | -5.446757 | 2.706744  | 0.773044  |
| 26 | 6 | 0 | -7.708102 | -0.217919 | -0.399658 |
| 27 | 6 | 0 | -8.281611 | 0.981959  | 0.022882  |
| 28 | 1 | 0 | -7.913444 | 2.972020  | 0.774401  |
| 29 | 1 | 0 | -8.322585 | -1.042879 | -0.745524 |
| 30 | 1 | 0 | -9.361430 | 1.093898  | 0.015813  |
| 31 | 6 | 0 | -6.322181 | -0.373336 | -0.400948 |
| 32 | 6 | 0 | 6.180869  | -1.069176 | -0.001661 |
| 33 | 8 | 0 | -5.769584 | -1.535293 | -0.881766 |
| 34 | 8 | 0 | 5.433499  | -2.201017 | 0.040716  |
| 35 | 6 | 0 | -5.511038 | -2.542186 | 0.108411  |
| 36 | 6 | 0 | 6.103831  | -3.460582 | 0.069008  |
| 37 | 1 | 0 | -5.097383 | -3.397641 | -0.427033 |
| 38 | 1 | 0 | -4.781516 | -2.194888 | 0.845712  |
| 39 | 1 | 0 | -6.437278 | -2.837868 | 0.614901  |
| 40 | 1 | 0 | 6.735072  | -3.556629 | 0.959375  |
| 41 | 1 | 0 | 5.316838  | -4.213995 | 0.099953  |
| 42 | 1 | 0 | 6.713986  | -3.607996 | -0.828983 |
| 43 | 6 | 0 | 1.458830  | 2.823445  | -0.052759 |
| 44 | 6 | 0 | -1.493717 | -2.185393 | 0.139091  |
| 45 | 9 | 0 | 0.630331  | 3.889868  | -0.073734 |
| 46 | 9 | 0 | 2.264901  | 2.968968  | 1.022945  |
| 47 | 9 | 0 | 2.245427  | 2.911172  | -1.148881 |
| 48 | 9 | 0 | -2.242168 | -2.263545 | 1.266111  |
| 49 | 9 | 0 | -2.336710 | -2.340828 | -0.905344 |
| 50 | 9 | 0 | -0.666072 | -3.251631 | 0.142523  |

**Table S5:** Cartesian coordinates for optimized geometry of **1d**

Standard orientation:

| Center<br>Number | Atomic<br>Number | Atomic<br>Type | Coordinates (Angstroms) |           |           |
|------------------|------------------|----------------|-------------------------|-----------|-----------|
|                  |                  |                | X                       | Y         | Z         |
| 1                | 6                | 0              | 0.724134                | 1.198443  | -0.000494 |
| 2                | 6                | 0              | -0.662648               | 1.222871  | 0.006460  |
| 3                | 6                | 0              | -1.419071               | 0.035232  | 0.007152  |
| 4                | 6                | 0              | -0.724135               | -1.198526 | 0.000521  |
| 5                | 6                | 0              | 0.662646                | -1.222954 | -0.006433 |
| 6                | 6                | 0              | 1.419070                | -0.035315 | -0.007126 |
| 7                | 1                | 0              | -1.182370               | 2.172131  | 0.011512  |
| 8                | 1                | 0              | 1.182369                | -2.172214 | -0.011485 |
| 9                | 6                | 0              | 2.836569                | -0.107753 | -0.014207 |
| 10               | 6                | 0              | -2.836570               | 0.107669  | 0.014229  |

|    |   |   |            |           |           |
|----|---|---|------------|-----------|-----------|
| 11 | 6 | 0 | -4.050786  | 0.173403  | 0.020161  |
| 12 | 6 | 0 | 4.050785   | -0.173483 | -0.020144 |
| 13 | 6 | 0 | 5.473322   | -0.201635 | -0.025854 |
| 14 | 6 | 0 | 6.172791   | -1.424828 | -0.028939 |
| 15 | 6 | 0 | 6.198851   | 1.007404  | -0.031994 |
| 16 | 6 | 0 | 7.562577   | -1.435967 | -0.035000 |
| 17 | 6 | 0 | 7.588031   | 0.990117  | -0.038264 |
| 18 | 1 | 0 | 5.661227   | 1.949130  | -0.034367 |
| 19 | 6 | 0 | 8.271389   | -0.230449 | -0.039687 |
| 20 | 1 | 0 | 8.097102   | -2.379123 | -0.043011 |
| 21 | 1 | 0 | 8.141906   | 1.922099  | -0.048975 |
| 22 | 6 | 0 | -5.473322  | 0.201606  | 0.025861  |
| 23 | 6 | 0 | -6.198893  | -1.007407 | 0.031990  |
| 24 | 6 | 0 | -6.172749  | 1.424824  | 0.028943  |
| 25 | 6 | 0 | -7.588073  | -0.990072 | 0.038246  |
| 26 | 1 | 0 | -5.661302  | -1.949151 | 0.034364  |
| 27 | 6 | 0 | -7.562535  | 1.436011  | 0.034990  |
| 28 | 6 | 0 | -8.271388  | 0.230517  | 0.039666  |
| 29 | 1 | 0 | -8.141980  | -1.922035 | 0.048948  |
| 30 | 1 | 0 | -8.097027  | 2.379186  | 0.042998  |
| 31 | 6 | 0 | 1.490152   | 2.500630  | -0.000602 |
| 32 | 6 | 0 | -1.490154  | -2.500713 | 0.000629  |
| 33 | 9 | 0 | 0.666580   | 3.569873  | 0.005853  |
| 34 | 9 | 0 | 2.291193   | 2.608191  | 1.082535  |
| 35 | 9 | 0 | 2.281491   | 2.613836  | -1.090290 |
| 36 | 9 | 0 | -2.281495  | -2.613918 | 1.090315  |
| 37 | 9 | 0 | -0.666581  | -3.569956 | -0.005825 |
| 38 | 9 | 0 | -2.291192  | -2.608274 | -1.082509 |
| 39 | 1 | 0 | -5.619410  | 2.357326  | 0.028982  |
| 40 | 1 | 0 | 5.619484   | -2.357349 | -0.028971 |
| 41 | 6 | 0 | -9.774347  | 0.245101  | -0.012922 |
| 42 | 6 | 0 | 9.774349   | -0.244979 | 0.012886  |
| 43 | 9 | 0 | -10.291328 | 1.349866  | 0.569903  |
| 44 | 9 | 0 | -10.312783 | -0.829229 | 0.606542  |
| 45 | 9 | 0 | -10.231512 | 0.227773  | -1.289199 |
| 46 | 9 | 0 | 10.312741  | 0.829362  | -0.606595 |
| 47 | 9 | 0 | 10.231525  | -0.227622 | 1.289158  |
| 48 | 9 | 0 | 10.291363  | -1.349733 | -0.569931 |

**Table S6:** Cartesian coordinates for optimized geometry of **1e**

Standard orientation:

| Center<br>Number | Atomic<br>Number | Atomic<br>Type | Coordinates (Angstroms) |           |          |
|------------------|------------------|----------------|-------------------------|-----------|----------|
|                  |                  |                | X                       | Y         | Z        |
| 1                | 6                | 0              | 0.730627                | -1.117379 | 0.000053 |
| 2                | 6                | 0              | -0.655991               | -1.151380 | 0.000057 |
| 3                | 6                | 0              | -1.425012               | 0.029161  | 0.000046 |
| 4                | 6                | 0              | -0.734285               | 1.266826  | 0.000033 |
| 5                | 6                | 0              | 0.652285                | 1.300819  | 0.000030 |
| 6                | 6                | 0              | 1.421351                | 0.120262  | 0.000041 |
| 7                | 1                | 0              | -1.167892               | -2.104973 | 0.000067 |

|    |   |   |            |           |           |
|----|---|---|------------|-----------|-----------|
| 8  | 1 | 0 | 1.164188   | 2.254411  | 0.000019  |
| 9  | 6 | 0 | 2.836728   | 0.204332  | 0.000041  |
| 10 | 6 | 0 | -2.840434  | -0.054143 | 0.000052  |
| 11 | 6 | 0 | -4.055546  | -0.131966 | 0.000055  |
| 12 | 6 | 0 | 4.051767   | 0.283328  | 0.000039  |
| 13 | 6 | 0 | 5.471292   | 0.335338  | 0.000002  |
| 14 | 6 | 0 | 6.159390   | 1.569786  | 0.000048  |
| 15 | 6 | 0 | 6.226474   | -0.852773 | -0.000082 |
| 16 | 6 | 0 | 7.543099   | 1.606469  | 0.000015  |
| 17 | 6 | 0 | 7.617963   | -0.822296 | -0.000118 |
| 18 | 1 | 0 | 5.709979   | -1.807045 | -0.000121 |
| 19 | 6 | 0 | 8.285309   | 0.411905  | -0.000068 |
| 20 | 1 | 0 | 8.078009   | 2.550254  | 0.000052  |
| 21 | 1 | 0 | 8.168353   | -1.754870 | -0.000186 |
| 22 | 6 | 0 | -5.475382  | -0.174691 | 0.000018  |
| 23 | 6 | 0 | -6.224029  | 1.024982  | 0.000061  |
| 24 | 6 | 0 | -6.170475  | -1.397978 | -0.000056 |
| 25 | 6 | 0 | -7.607488  | 0.994079  | 0.000030  |
| 26 | 1 | 0 | -5.700656  | 1.975385  | 0.000121  |
| 27 | 6 | 0 | -7.562210  | -1.435432 | -0.000088 |
| 28 | 6 | 0 | -8.289710  | -0.235897 | -0.000045 |
| 29 | 1 | 0 | -8.188121  | 1.910447  | 0.000064  |
| 30 | 1 | 0 | -8.066282  | -2.393803 | -0.000145 |
| 31 | 6 | 0 | 1.503170   | -2.414043 | 0.000079  |
| 32 | 6 | 0 | -1.506859  | 2.563579  | 0.000008  |
| 33 | 9 | 0 | 0.686661   | -3.490287 | 0.000055  |
| 34 | 9 | 0 | 2.301100   | -2.523231 | -1.086254 |
| 35 | 9 | 0 | 2.301025   | -2.523223 | 1.086469  |
| 36 | 9 | 0 | -2.304657  | 2.672618  | -1.086386 |
| 37 | 9 | 0 | -0.690276  | 3.639693  | 0.000023  |
| 38 | 9 | 0 | -2.304713  | 2.672632  | 1.086359  |
| 39 | 1 | 0 | -5.611073  | -2.327701 | -0.000089 |
| 40 | 1 | 0 | 5.593488   | 2.495448  | 0.000113  |
| 41 | 8 | 0 | -9.645661  | -0.156172 | -0.000069 |
| 42 | 8 | 0 | 9.635629   | 0.558749  | -0.000099 |
| 43 | 6 | 0 | -10.400099 | -1.367488 | -0.000154 |
| 44 | 6 | 0 | 10.449239  | -0.613719 | -0.000112 |
| 45 | 1 | 0 | -10.194143 | -1.966165 | 0.894212  |
| 46 | 1 | 0 | -11.447499 | -1.065792 | -0.000167 |
| 47 | 1 | 0 | -10.194093 | -1.966071 | -0.894571 |
| 48 | 1 | 0 | 11.480374  | -0.260412 | -0.000077 |
| 49 | 1 | 0 | 10.273140  | -1.221841 | 0.894224  |
| 50 | 1 | 0 | 10.273185  | -1.221791 | -0.894491 |

**Table S7:** Cartesian coordinates for optimized geometry of **2a**

Standard orientation:

| Center<br>Number | Atomic<br>Number | Atomic<br>Type | Coordinates (Angstroms) |           |          |
|------------------|------------------|----------------|-------------------------|-----------|----------|
|                  |                  |                | X                       | Y         | Z        |
| 1                | 6                | 0              | -0.719098               | -1.187166 | 0.196684 |
| 2                | 6                | 0              | 0.669591                | -1.205051 | 0.201656 |

|    |   |   |           |           |           |
|----|---|---|-----------|-----------|-----------|
| 3  | 6 | 0 | 1.419071  | -0.027106 | 0.009614  |
| 4  | 6 | 0 | 0.719091  | 1.187000  | -0.196811 |
| 5  | 6 | 0 | -0.669598 | 1.204886  | -0.201784 |
| 6  | 6 | 0 | -1.419078 | 0.026941  | -0.009739 |
| 7  | 1 | 0 | 1.179220  | -2.148663 | 0.361615  |
| 8  | 1 | 0 | -1.179228 | 2.148498  | -0.361746 |
| 9  | 6 | 0 | -2.839560 | 0.067376  | 0.001439  |
| 10 | 6 | 0 | 2.839552  | -0.067542 | -0.001570 |
| 11 | 6 | 0 | 4.055669  | -0.126382 | -0.006585 |
| 12 | 6 | 0 | -4.055675 | 0.126240  | 0.006468  |
| 13 | 6 | 0 | -5.479197 | 0.190207  | 0.018036  |
| 14 | 6 | 0 | -6.143268 | 1.409240  | -0.230838 |
| 15 | 6 | 0 | -6.245396 | -0.964943 | 0.278258  |
| 16 | 6 | 0 | -7.534328 | 1.465901  | -0.218769 |
| 17 | 6 | 0 | -7.635930 | -0.897237 | 0.288005  |
| 18 | 1 | 0 | -5.739005 | -1.904896 | 0.471526  |
| 19 | 6 | 0 | -8.284922 | 0.315592  | 0.039992  |
| 20 | 1 | 0 | -8.034550 | 2.410066  | -0.411781 |
| 21 | 1 | 0 | -8.215343 | -1.793035 | 0.489903  |
| 22 | 6 | 0 | 5.479199  | -0.190185 | -0.018018 |
| 23 | 6 | 0 | 6.245290  | 0.965051  | -0.278174 |
| 24 | 6 | 0 | 6.143386  | -1.409141 | 0.230918  |
| 25 | 6 | 0 | 7.635833  | 0.897504  | -0.287796 |
| 26 | 1 | 0 | 5.738810  | 1.904947  | -0.471491 |
| 27 | 6 | 0 | 7.534454  | -1.465645 | 0.218974  |
| 28 | 6 | 0 | 8.284940  | -0.315251 | -0.039721 |
| 29 | 1 | 0 | 8.215162  | 1.793366  | -0.489646 |
| 30 | 1 | 0 | 8.034765  | -2.409753 | 0.412033  |
| 31 | 8 | 0 | 1.403255  | 2.355110  | -0.440285 |
| 32 | 8 | 0 | -1.403262 | -2.355276 | 0.440154  |
| 33 | 6 | 0 | 1.868731  | 3.035738  | 0.734190  |
| 34 | 6 | 0 | -1.868745 | -3.035897 | -0.734322 |
| 35 | 1 | 0 | 2.569023  | 2.414052  | 1.302007  |
| 36 | 1 | 0 | 2.381512  | 3.933567  | 0.385534  |
| 37 | 1 | 0 | 1.029006  | 3.321446  | 1.378591  |
| 38 | 1 | 0 | -2.569048 | -2.414211 | -1.302126 |
| 39 | 1 | 0 | -1.029026 | -3.321594 | -1.378734 |
| 40 | 1 | 0 | -2.381516 | -3.933733 | -0.385669 |
| 41 | 1 | 0 | 5.558514  | -2.300783 | 0.431644  |
| 42 | 1 | 0 | -5.558313 | 2.300815  | -0.431615 |
| 43 | 1 | 0 | 9.369519  | -0.363613 | -0.048178 |
| 44 | 1 | 0 | -9.369495 | 0.364077  | 0.048545  |

**Table S8:** Cartesian coordinates for optimized geometry of **2b**

Standard orientation:

| Center<br>Number | Atomic<br>Number | Atomic<br>Type | Coordinates (Angstroms) |          |           |
|------------------|------------------|----------------|-------------------------|----------|-----------|
|                  |                  |                | X                       | Y        | Z         |
| 1                | 6                | 0              | 0.881513                | 1.016970 | 0.399749  |
| 2                | 6                | 0              | -0.488253               | 1.248207 | 0.383275  |
| 3                | 6                | 0              | -1.395599               | 0.244255 | -0.008751 |

|    |   |   |           |           |           |
|----|---|---|-----------|-----------|-----------|
| 4  | 6 | 0 | -0.881687 | -1.016173 | -0.401099 |
| 5  | 6 | 0 | 0.488075  | -1.247440 | -0.384568 |
| 6  | 6 | 0 | 1.395426  | -0.243512 | 0.007536  |
| 7  | 1 | 0 | -0.857990 | 2.219907  | 0.691122  |
| 8  | 1 | 0 | 0.857846  | -2.219116 | -0.692454 |
| 9  | 6 | 0 | 2.792632  | -0.503920 | 0.026364  |
| 10 | 6 | 0 | -2.792844 | 0.504462  | -0.027282 |
| 11 | 6 | 0 | -3.986912 | 0.737271  | -0.029688 |
| 12 | 6 | 0 | 3.986649  | -0.737008 | 0.029164  |
| 13 | 6 | 0 | 5.371344  | -1.071049 | 0.046919  |
| 14 | 6 | 0 | 6.394923  | -0.092353 | -0.004202 |
| 15 | 6 | 0 | 5.745949  | -2.427028 | 0.119977  |
| 16 | 6 | 0 | 7.734520  | -0.476212 | 0.022293  |
| 17 | 6 | 0 | 7.087189  | -2.798427 | 0.146223  |
| 18 | 1 | 0 | 4.966810  | -3.180340 | 0.158610  |
| 19 | 6 | 0 | 8.085181  | -1.824681 | 0.099232  |
| 20 | 1 | 0 | 8.504829  | 0.284276  | -0.018796 |
| 21 | 1 | 0 | 7.351259  | -3.849569 | 0.204390  |
| 22 | 1 | 0 | 9.131941  | -2.109059 | 0.120196  |
| 23 | 6 | 0 | -5.371687 | 1.070977  | -0.047022 |
| 24 | 6 | 0 | -5.746691 | 2.426812  | -0.120644 |
| 25 | 6 | 0 | -6.394969 | 0.092019  | 0.005044  |
| 26 | 6 | 0 | -7.088046 | 2.797822  | -0.146555 |
| 27 | 1 | 0 | -4.967776 | 3.180319  | -0.159995 |
| 28 | 6 | 0 | -7.734684 | 0.475488  | -0.021142 |
| 29 | 6 | 0 | -8.085746 | 1.823821  | -0.098657 |
| 30 | 1 | 0 | -7.352434 | 3.848859  | -0.205178 |
| 31 | 1 | 0 | -8.504767 | -0.285189 | 0.020668  |
| 32 | 1 | 0 | -9.132594 | 2.107898  | -0.119353 |
| 33 | 6 | 0 | 6.043385  | 1.368495  | -0.112407 |
| 34 | 6 | 0 | -6.042963 | -1.368676 | 0.113851  |
| 35 | 9 | 0 | 7.140366  | 2.156790  | -0.126895 |
| 36 | 9 | 0 | 5.355037  | 1.635697  | -1.251349 |
| 37 | 9 | 0 | 5.270550  | 1.788838  | 0.915803  |
| 38 | 9 | 0 | -5.270585 | -1.789355 | -0.914563 |
| 39 | 9 | 0 | -5.353919 | -1.635084 | 1.252553  |
| 40 | 9 | 0 | -7.139725 | -2.157263 | 0.129373  |
| 41 | 8 | 0 | -1.724166 | -2.000641 | -0.854731 |
| 42 | 8 | 0 | 1.723842  | 2.001635  | 0.853193  |
| 43 | 6 | 0 | -2.292617 | -2.835127 | 0.167158  |
| 44 | 6 | 0 | 2.293594  | 2.834865  | -0.169003 |
| 45 | 1 | 0 | -2.908937 | -2.253167 | 0.857772  |
| 46 | 1 | 0 | -2.922946 | -3.560508 | -0.348539 |
| 47 | 1 | 0 | -1.505911 | -3.359085 | 0.722361  |
| 48 | 1 | 0 | 2.909805  | 2.251920  | -0.858867 |
| 49 | 1 | 0 | 1.507608  | 3.359066  | -0.725002 |
| 50 | 1 | 0 | 2.924246  | 3.560095  | 0.346506  |

**Table S9:** Cartesian coordinates for optimized geometry of **2c**

Standard orientation:

-----  
Center      Atomic      Atomic      Coordinates (Angstroms)



| Number | Number | Type | X         | Y         | Z         |
|--------|--------|------|-----------|-----------|-----------|
| 1      | 6      | 0    | -0.840668 | -1.101371 | 0.226871  |
| 2      | 6      | 0    | 0.539205  | -1.260069 | 0.234947  |
| 3      | 6      | 0    | 1.410286  | -0.174065 | 0.013660  |
| 4      | 6      | 0    | 0.840670  | 1.101353  | -0.226843 |
| 5      | 6      | 0    | -0.539203 | 1.260051  | -0.234919 |
| 6      | 6      | 0    | -1.410285 | 0.174047  | -0.013632 |
| 7      | 1      | 0    | 0.946892  | -2.247430 | 0.420962  |
| 8      | 1      | 0    | -0.946890 | 2.247412  | -0.420934 |
| 9      | 6      | 0    | -2.816781 | 0.372749  | -0.001592 |
| 10     | 6      | 0    | 2.816783  | -0.372765 | 0.001619  |
| 11     | 6      | 0    | 4.019709  | -0.562250 | 0.002545  |
| 12     | 6      | 0    | -4.019706 | 0.562240  | -0.002521 |
| 13     | 6      | 0    | -5.420983 | 0.801683  | -0.001852 |
| 14     | 6      | 0    | -6.338829 | -0.282816 | 0.029533  |
| 15     | 6      | 0    | -5.925177 | 2.114858  | -0.033817 |
| 16     | 6      | 0    | -7.714165 | -0.030737 | 0.032192  |
| 17     | 6      | 0    | -7.295707 | 2.360107  | -0.031876 |
| 18     | 1      | 0    | -5.218461 | 2.937883  | -0.058779 |
| 19     | 6      | 0    | -8.184153 | 1.284795  | 0.002070  |
| 20     | 1      | 0    | -8.422307 | -0.849622 | 0.056683  |
| 21     | 1      | 0    | -7.665775 | 3.379721  | -0.055840 |
| 22     | 1      | 0    | -9.255377 | 1.462214  | 0.004481  |
| 23     | 6      | 0    | 5.420988  | -0.801680 | 0.001872  |
| 24     | 6      | 0    | 5.925195  | -2.114849 | 0.033886  |
| 25     | 6      | 0    | 6.338823  | 0.282826  | -0.029569 |
| 26     | 6      | 0    | 7.295727  | -2.360085 | 0.031941  |
| 27     | 1      | 0    | 5.218487  | -2.937880 | 0.058890  |
| 28     | 6      | 0    | 7.714161  | 0.030761  | -0.032232 |
| 29     | 6      | 0    | 8.184162  | -1.284766 | -0.002061 |
| 30     | 1      | 0    | 7.665806  | -3.379694 | 0.055943  |
| 31     | 1      | 0    | 8.422295  | 0.849651  | -0.056765 |
| 32     | 1      | 0    | 9.255388  | -1.462174 | -0.004476 |
| 33     | 8      | 0    | 1.625965  | 2.193277  | -0.512451 |
| 34     | 8      | 0    | -1.625964 | -2.193295 | 0.512478  |
| 35     | 6      | 0    | 2.294085  | 2.784714  | 0.612379  |
| 36     | 6      | 0    | -2.294080 | -2.784733 | -0.612353 |
| 37     | 1      | 0    | 3.032496  | 2.102068  | 1.042526  |
| 38     | 1      | 0    | 2.803166  | 3.671143  | 0.229955  |
| 39     | 1      | 0    | 1.570865  | 3.083656  | 1.380149  |
| 40     | 1      | 0    | -3.032489 | -2.102088 | -1.042504 |
| 41     | 1      | 0    | -1.570858 | -3.083678 | -1.380119 |
| 42     | 1      | 0    | -2.803163 | -3.671161 | -0.229929 |
| 43     | 8      | 0    | 5.785914  | 1.524243  | -0.052548 |
| 44     | 8      | 0    | -5.785933 | -1.524239 | 0.052466  |
| 45     | 6      | 0    | 6.653543  | 2.655512  | -0.091012 |
| 46     | 6      | 0    | -6.653573 | -2.655502 | 0.090874  |
| 47     | 1      | 0    | 6.001353  | 3.528678  | -0.108021 |
| 48     | 1      | 0    | 7.295307  | 2.698005  | 0.796319  |
| 49     | 1      | 0    | 7.277622  | 2.650204  | -0.991736 |
| 50     | 1      | 0    | -7.295329 | -2.697950 | -0.796466 |
| 51     | 1      | 0    | -6.001392 | -3.528674 | 0.107852  |
| 52     | 1      | 0    | -7.277661 | -2.650225 | 0.991591  |

**Table S10:** Cartesian coordinates for optimized geometry of **2d**

Standard orientation:

| Center<br>Number | Atomic<br>Number | Atomic<br>Type | Coordinates (Angstroms) |           |           |
|------------------|------------------|----------------|-------------------------|-----------|-----------|
|                  |                  |                | X                       | Y         | Z         |
| 1                | 6                | 0              | 0.691066                | -1.206061 | -0.188768 |
| 2                | 6                | 0              | -0.697548               | -1.190011 | -0.204570 |
| 3                | 6                | 0              | -1.416876               | 0.007586  | -0.020655 |
| 4                | 6                | 0              | -0.691067               | 1.206004  | 0.188826  |
| 5                | 6                | 0              | 0.697546                | 1.189954  | 0.204630  |
| 6                | 6                | 0              | 1.416875                | -0.007642 | 0.020712  |
| 7                | 1                | 0              | -1.229924               | -2.120491 | -0.366808 |
| 8                | 1                | 0              | 1.229923                | 2.120434  | 0.366869  |
| 9                | 6                | 0              | 2.837683                | -0.003746 | 0.021355  |
| 10               | 6                | 0              | -2.837684               | 0.003695  | -0.021302 |
| 11               | 6                | 0              | -4.054540               | -0.022737 | -0.025883 |
| 12               | 6                | 0              | 4.054539                | 0.022695  | 0.025928  |
| 13               | 6                | 0              | 5.477919                | 0.049766  | 0.024394  |
| 14               | 6                | 0              | 6.171549                | 1.244760  | 0.306185  |
| 15               | 6                | 0              | 6.215854                | -1.118847 | -0.255192 |
| 16               | 6                | 0              | 7.560904                | 1.268248  | 0.305402  |
| 17               | 6                | 0              | 7.605264                | -1.090021 | -0.255392 |
| 18               | 1                | 0              | 5.689856                | -2.042574 | -0.469423 |
| 19               | 6                | 0              | 8.280558                | 0.102137  | 0.025071  |
| 20               | 1                | 0              | 8.087185                | 2.189483  | 0.529211  |
| 21               | 1                | 0              | 8.165881                | -1.993791 | -0.466395 |
| 22               | 6                | 0              | -5.477920               | -0.049794 | -0.024378 |
| 23               | 6                | 0              | -6.215848               | 1.118877  | 0.254989  |
| 24               | 6                | 0              | -6.171559               | -1.244827 | -0.305978 |
| 25               | 6                | 0              | -7.605257               | 1.090069  | 0.255159  |
| 26               | 1                | 0              | -5.689842               | 2.042635  | 0.469072  |
| 27               | 6                | 0              | -7.560916               | -1.268299 | -0.305221 |
| 28               | 6                | 0              | -8.280560               | -0.102131 | -0.025112 |
| 29               | 1                | 0              | -8.165867               | 1.993884  | 0.465988  |
| 30               | 1                | 0              | -8.087203               | -2.189566 | -0.528879 |
| 31               | 8                | 0              | -1.351431               | 2.387928  | 0.423835  |
| 32               | 8                | 0              | 1.351427                | -2.387986 | -0.423779 |
| 33               | 6                | 0              | -1.766632               | 3.091535  | -0.756831 |
| 34               | 6                | 0              | 1.766665                | -3.091575 | 0.756886  |
| 35               | 1                | 0              | -2.467657               | 2.493341  | -1.348573 |
| 36               | 1                | 0              | -2.264286               | 3.999511  | -0.413107 |
| 37               | 1                | 0              | -0.902552               | 3.359694  | -1.375761 |
| 38               | 1                | 0              | 2.467706                | -2.493371 | 1.348598  |
| 39               | 1                | 0              | 0.902604                | -3.359728 | 1.375844  |
| 40               | 1                | 0              | 2.264312                | -3.999554 | 0.413158  |
| 41               | 1                | 0              | -5.611552               | -2.146846 | -0.526593 |
| 42               | 1                | 0              | 5.611535                | 2.146733  | 0.526969  |
| 43               | 6                | 0              | -9.781695               | -0.145718 | 0.032857  |
| 44               | 6                | 0              | 9.781690                | 0.145780  | -0.032919 |
| 45               | 9                | 0              | -10.295341              | -1.064834 | -0.816004 |
| 46               | 9                | 0              | -10.228561              | -0.470222 | 1.271744  |
| 47               | 9                | 0              | -10.336981              | 1.047207  | -0.278773 |

|    |   |   |           |           |           |
|----|---|---|-----------|-----------|-----------|
| 48 | 9 | 0 | 10.295332 | 1.064531  | 0.816343  |
| 49 | 9 | 0 | 10.228516 | 0.470862  | -1.271669 |
| 50 | 9 | 0 | 10.337018 | -1.047267 | 0.278161  |

**Table S11:** Cartesian coordinates for optimized geometry of **2e**

Standard orientation:

| Center Number | Atomic Number | Atomic Type | Coordinates (Angstroms) |           |           |
|---------------|---------------|-------------|-------------------------|-----------|-----------|
|               |               |             | X                       | Y         | Z         |
| 1             | 6             | 0           | 0.663486                | 1.220105  | 0.184457  |
| 2             | 6             | 0           | -0.724409               | 1.174803  | 0.184051  |
| 3             | 6             | 0           | -1.420819               | -0.037645 | 0.003967  |
| 4             | 6             | 0           | -0.663484               | -1.220064 | -0.184443 |
| 5             | 6             | 0           | 0.724411                | -1.174762 | -0.184037 |
| 6             | 6             | 0           | 1.420821                | 0.037686  | -0.003954 |
| 7             | 1             | 0           | -1.276139               | 2.096856  | 0.329953  |
| 8             | 1             | 0           | 1.276141                | -2.096816 | -0.329940 |
| 9             | 6             | 0           | 2.841182                | 0.061304  | 0.013394  |
| 10            | 6             | 0           | -2.841180               | -0.061263 | -0.013380 |
| 11            | 6             | 0           | -4.059397               | -0.055683 | -0.022685 |
| 12            | 6             | 0           | 4.059399                | 0.055719  | 0.022698  |
| 13            | 6             | 0           | 5.482235                | 0.056266  | 0.038843  |
| 14            | 6             | 0           | 6.209370                | -1.123743 | -0.204327 |
| 15            | 6             | 0           | 6.203991                | 1.243561  | 0.299021  |
| 16            | 6             | 0           | 7.602200                | -1.131221 | -0.191363 |
| 17            | 6             | 0           | 7.588680                | 1.243008  | 0.313668  |
| 18            | 1             | 0           | 5.662092                | 2.163894  | 0.490191  |
| 19            | 6             | 0           | 8.301103                | 0.056268  | 0.068596  |
| 20            | 1             | 0           | 8.128304                | -2.058126 | -0.383433 |
| 21            | 1             | 0           | 8.146215                | 2.152076  | 0.513430  |
| 22            | 6             | 0           | -5.482233               | -0.056256 | -0.038839 |
| 23            | 6             | 0           | -6.203965               | -1.243565 | -0.299020 |
| 24            | 6             | 0           | -6.209391               | 1.123740  | 0.204326  |
| 25            | 6             | 0           | -7.588654               | -1.243038 | -0.313675 |
| 26            | 1             | 0           | -5.662048               | -2.163888 | -0.490185 |
| 27            | 6             | 0           | -7.602222               | 1.131191  | 0.191353  |
| 28            | 6             | 0           | -8.301100               | -0.056311 | -0.068609 |
| 29            | 1             | 0           | -8.146171               | -2.152117 | -0.513440 |
| 30            | 1             | 0           | -8.128344               | 2.058087  | 0.383419  |
| 31            | 8             | 0           | -1.290824               | -2.423236 | -0.415574 |
| 32            | 8             | 0           | 1.290826                | 2.423277  | 0.415587  |
| 33            | 6             | 0           | -1.744298               | -3.100977 | 0.764664  |
| 34            | 6             | 0           | 1.744298                | 3.101019  | -0.764651 |
| 35            | 1             | 0           | -2.480147               | -2.500542 | 1.309889  |
| 36            | 1             | 0           | -2.211614               | -4.027356 | 0.426572  |
| 37            | 1             | 0           | -0.903049               | -3.337103 | 1.427117  |
| 38            | 1             | 0           | 2.480154                | 2.500589  | -1.309871 |
| 39            | 1             | 0           | 0.903049                | 3.337135  | -1.427108 |
| 40            | 1             | 0           | 2.211604                | 4.027403  | -0.426560 |
| 41            | 1             | 0           | -5.673326               | 2.045354  | 0.406231  |
| 42            | 1             | 0           | 5.673286                | -2.045347 | -0.406231 |

|    |   |   |            |           |           |
|----|---|---|------------|-----------|-----------|
| 43 | 8 | 0 | -9.656586  | -0.163656 | -0.105608 |
| 44 | 8 | 0 | 9.656591   | 0.163588  | 0.105588  |
| 45 | 6 | 0 | -10.437610 | 1.005219  | 0.135207  |
| 46 | 6 | 0 | 10.437592  | -1.005300 | -0.135239 |
| 47 | 1 | 0 | -10.236219 | 1.781870  | -0.611367 |
| 48 | 1 | 0 | -11.478236 | 0.690071  | 0.056895  |
| 49 | 1 | 0 | -10.254917 | 1.409052  | 1.137532  |
| 50 | 1 | 0 | 11.478224  | -0.690170 | -0.056936 |
| 51 | 1 | 0 | 10.236194  | -1.781950 | 0.611335  |
| 52 | 1 | 0 | 10.254882  | -1.409127 | -1.137563 |

**Table S12:** Total energies for optimized derivatives **1**

| Compound          | 1a         | 1b         | 1c         | 1d         | 1e         |
|-------------------|------------|------------|------------|------------|------------|
| Energy (Hartrees) | 1520.47689 | 2194.53351 | 1794.46026 | 2194.53797 | 1749.46774 |

**Table S13:** Total energies for optimized derivatives **2**

| Compound          | 2a         | 2b         | 2c         | 2d         | 2e         |
|-------------------|------------|------------|------------|------------|------------|
| Energy (Hartrees) | 1075.39827 | 1749.45727 | 1304.38520 | 1749.46057 | 1304.38807 |

#### 4. SEM Images

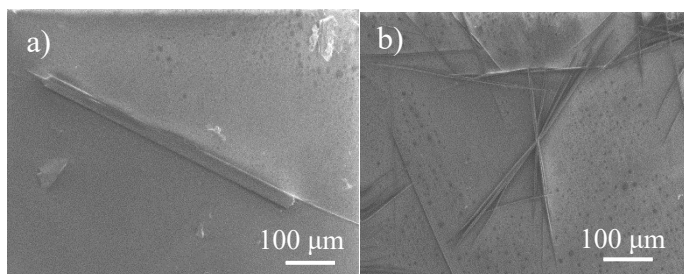

**Figure S2:** SEM images for supramolecular aggregates **1b,c** using the mixture of solvents a) **1b**, (THF/ethanol) and b) **1c**, (THF/methanol).

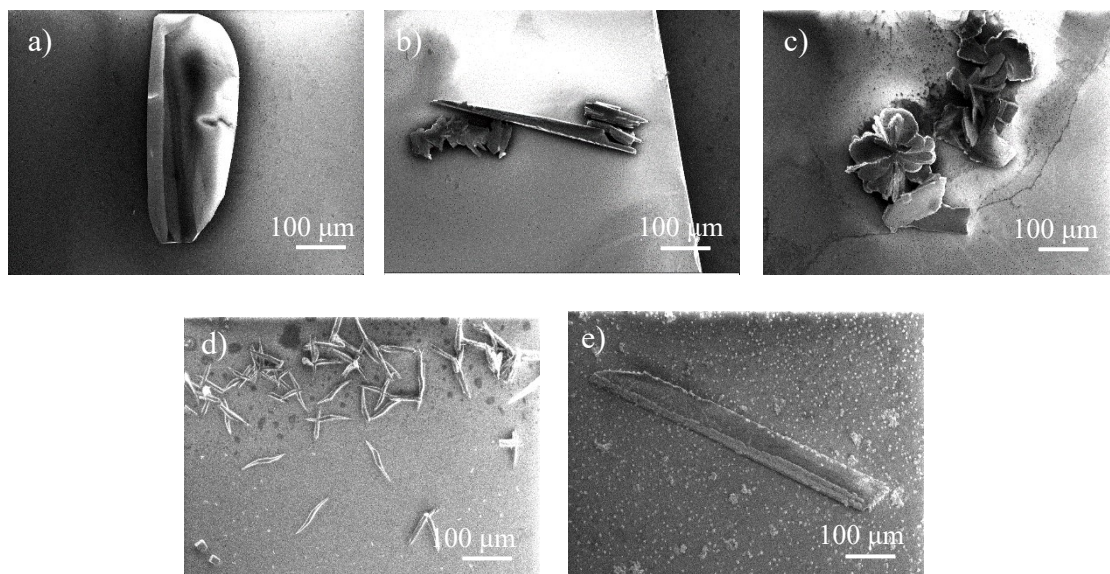

**Figure S3:** SEM images for supramolecular aggregates of **2a-e** using the mixture of solvents a) **2a**, (THF/methanol) b) **2b**, (CHCl<sub>3</sub>/ethanol), c) **2c**, (THF/methanol), d) **2d** (CHCl<sub>3</sub>/ethanol) and e) **2e** (THF/ethanol).

## 5. X-Ray diffraction studies

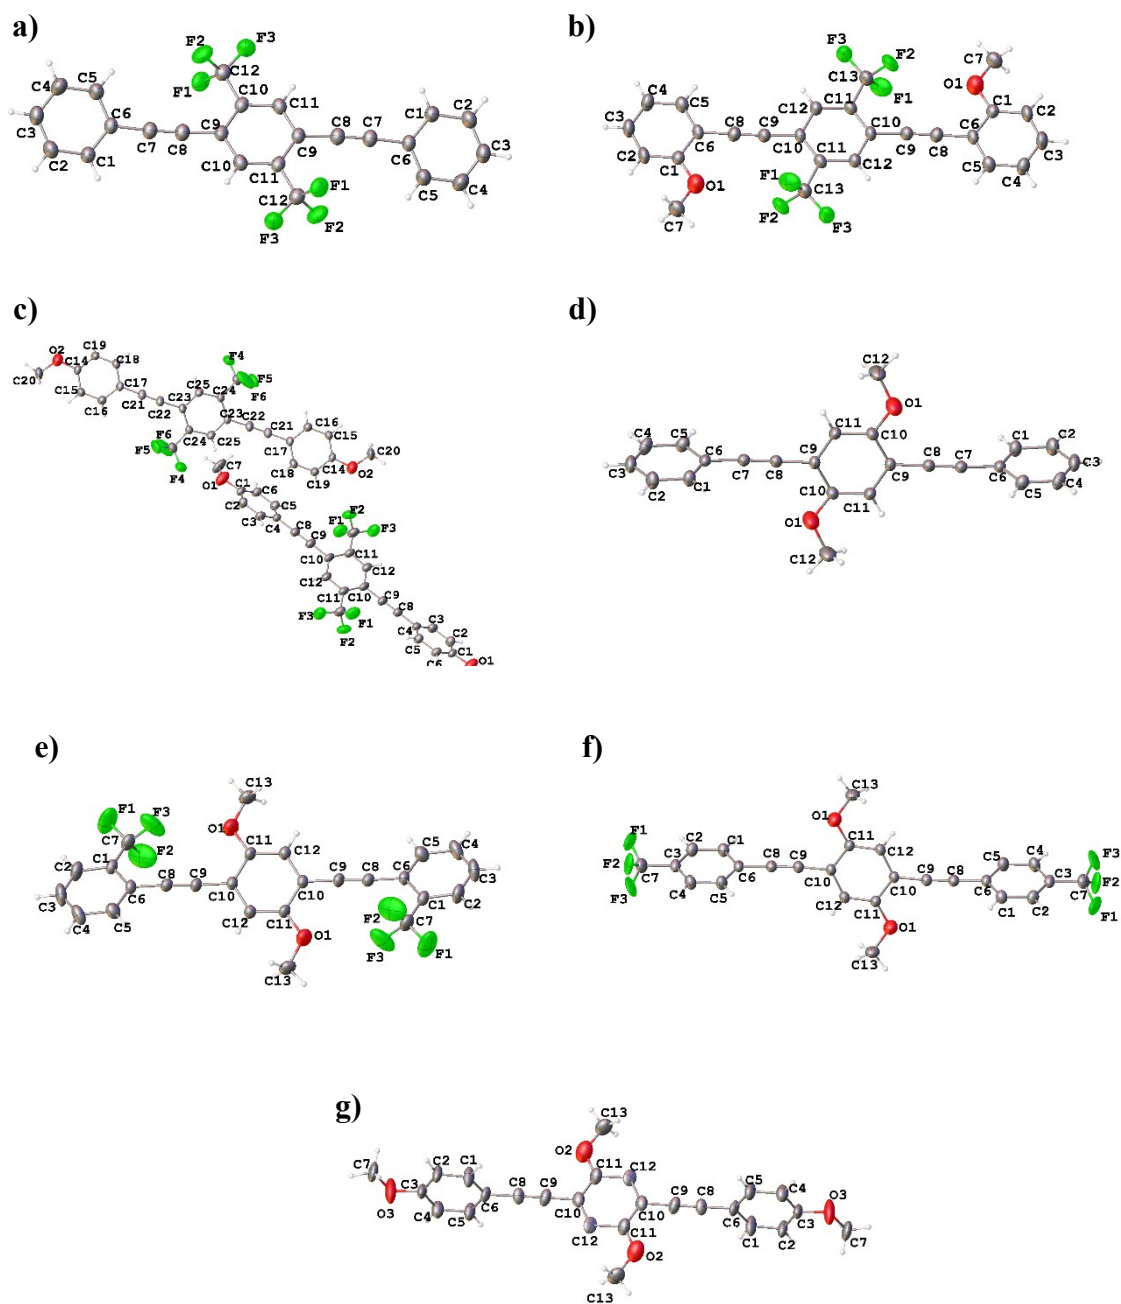

**Figure S4:** Ortep drawing of compounds a) 1a, b) 1c, c) 1e, d) 2a, e) 2b, f) 2d, y g) 2e. Ellipsoids are given at the 30 % probability level.

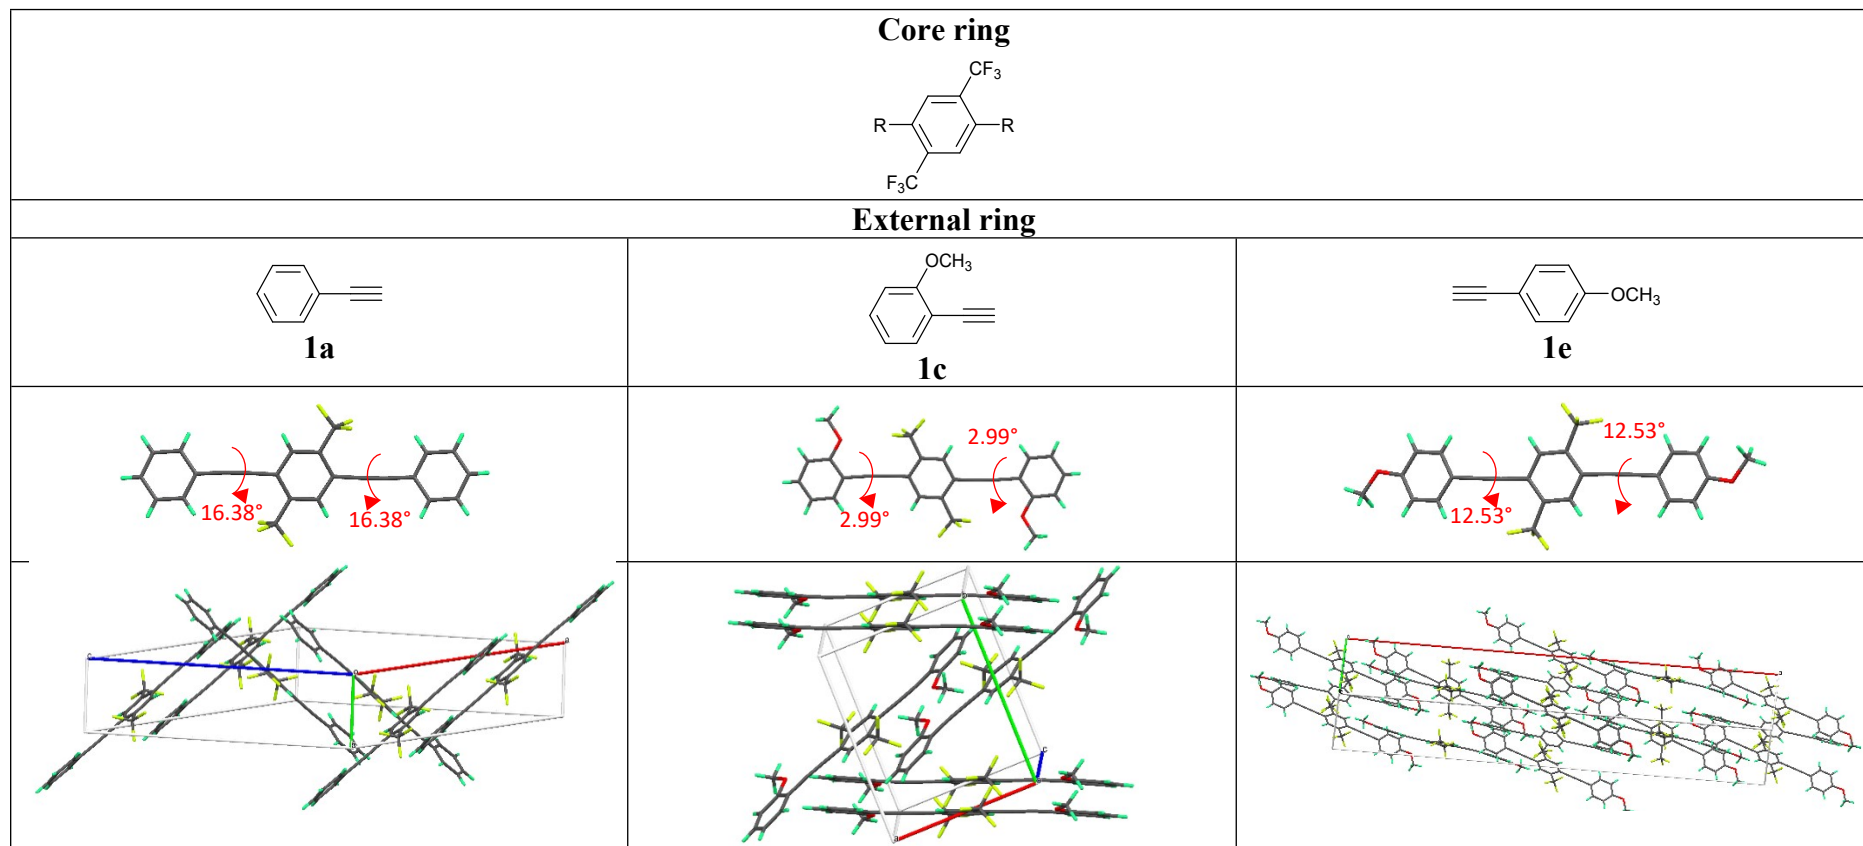

**Figure S5:** X-Ray structure of compounds **1a**, **1c** and **1e**

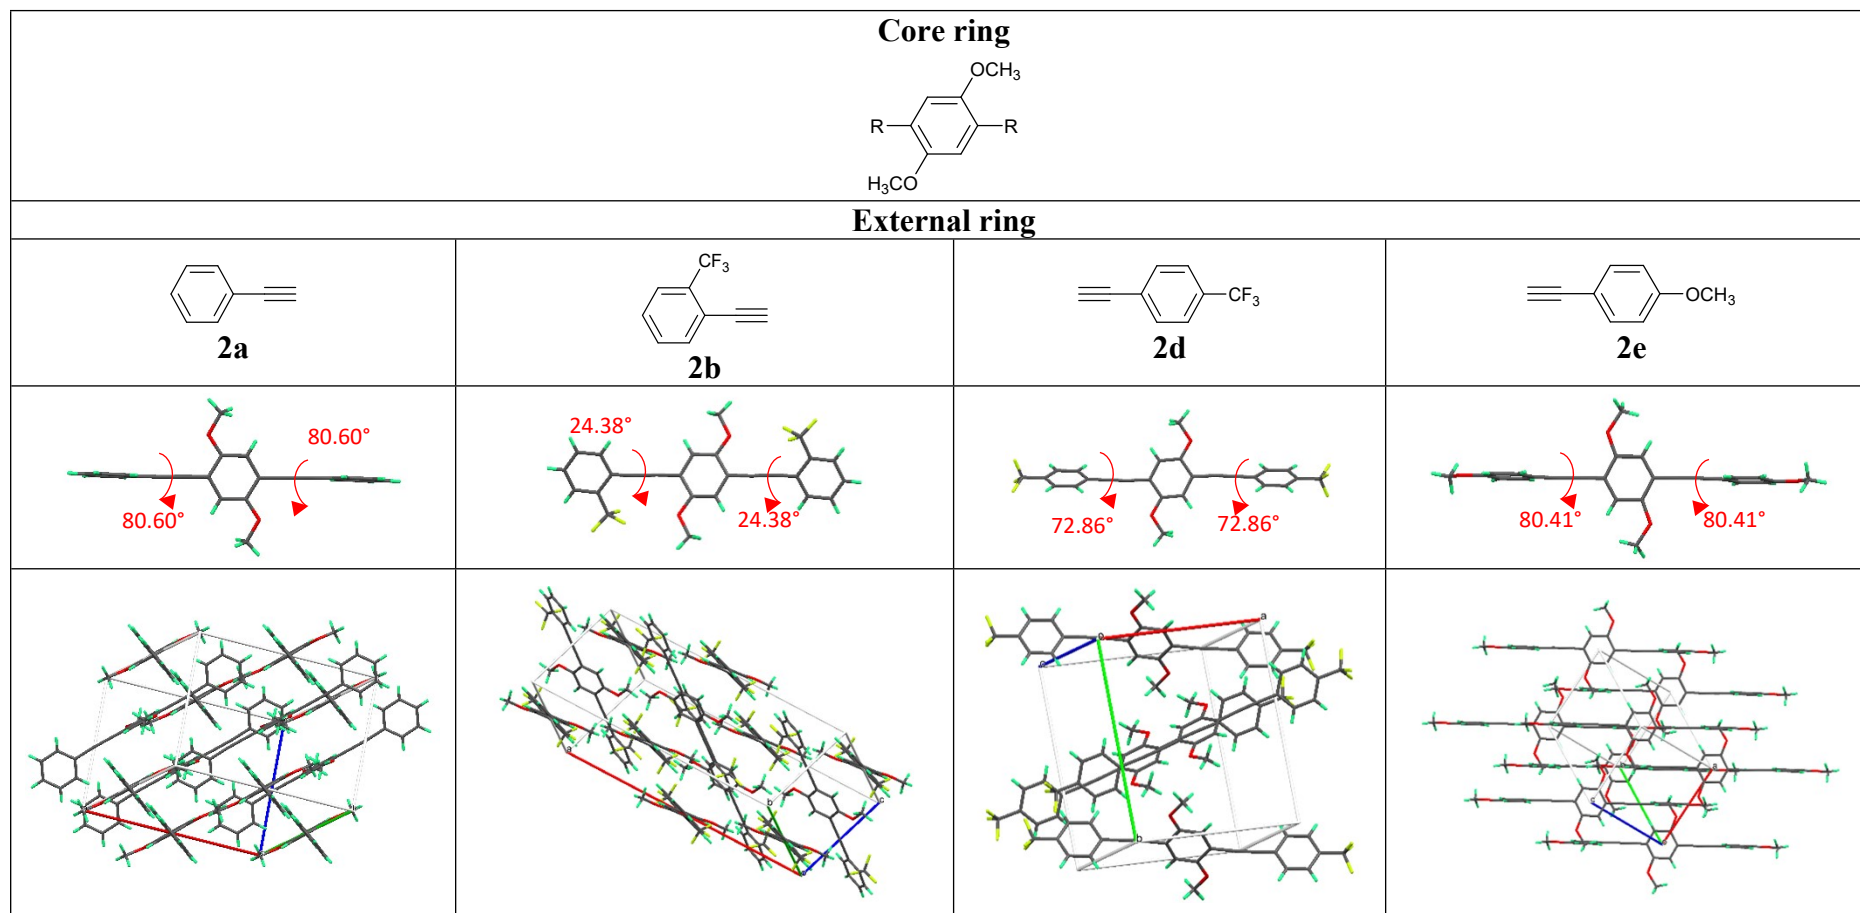

**Figure S6:** X-Ray structure of compounds **2a**, **2b**, **2d** and **2e**



**Table S14.** Crystal data and structure refinement for **1a**, **1c** and **1e**.

|                                              | <b>1a</b>                                      | <b>1c</b>                                                     | <b>1e</b>                                                     |
|----------------------------------------------|------------------------------------------------|---------------------------------------------------------------|---------------------------------------------------------------|
| Empirical formula                            | C <sub>24</sub> H <sub>12</sub> F <sub>6</sub> | C <sub>26</sub> H <sub>16</sub> F <sub>6</sub> O <sub>2</sub> | C <sub>26</sub> H <sub>16</sub> F <sub>6</sub> O <sub>2</sub> |
| Formula weight                               | 414.34                                         | 474.39                                                        | 474.39                                                        |
| Temperature (K)                              | 290(2)                                         | 290(2)                                                        | 290(2)                                                        |
| Wavelength (Å)                               | 0.71073                                        | 0.71073                                                       | 0.71073                                                       |
| Crystal system                               | Monoclinic                                     | Monoclinic                                                    | Monoclinic                                                    |
| Space group                                  | C 2/c                                          | P 2 <sub>1</sub> /n                                           | C 2/c                                                         |
| a(Å)                                         | 23.127(13)                                     | 8.656(6)                                                      | 50.82(4)                                                      |
| b(Å)                                         | 4.957(3)                                       | 11.264(8)                                                     | 11.076(9)                                                     |
| c(Å)                                         | 18.228(10)                                     | 11.003(8)                                                     | 8.019(7)                                                      |
| α(°)                                         | 90                                             | 90                                                            | 90                                                            |
| β(°)                                         | 115.632(7)                                     | 96.45(3)                                                      | 92.988(14)                                                    |
| γ(°)                                         | 90                                             | 90                                                            | 90                                                            |
| Volume(Å <sup>3</sup> )                      | 1884.0(19)                                     | 1066.1(13)                                                    | 4508(7)                                                       |
| Z                                            | 4                                              | 2                                                             | 8                                                             |
| Density (calculated) (g/cm <sup>3</sup> )    | 1.461                                          | 1.478                                                         | 1.398                                                         |
| Absorption coefficient (mm <sup>-1</sup> )   | 0.126                                          | 0.128                                                         | 0.121                                                         |
| F(000)                                       | 840                                            | 484                                                           | 1936                                                          |
| Crystal size (mm <sup>3</sup> )              | 0.36 x 0.09 x 0.03                             | 0.17 x 0.09 x 0.03                                            | 0.25 x 0.09 x 0.07                                            |
| Index ranges                                 | -27 ≤ h ≤ 28<br>-6 ≤ k ≤ 6<br>-21 ≤ l ≤ 22     | -10 ≤ h ≤ 10<br>-13 ≤ k ≤ 13<br>-13 ≤ l ≤ 12                  | -63 ≤ h ≤ 62<br>-13 ≤ k ≤ 13<br>-10 ≤ l ≤ 9                   |
| Reflections collected                        | 6273                                           | 5990                                                          | 12348                                                         |
| Independent reflections                      | 1903<br>[R(int) = 0.0581]                      | 1863<br>[R(int) = 0.0915]                                     | 4558<br>[R(int) = 0.0856]                                     |
| Data / restraints / parameters               | 1903 / 0 / 137                                 | 1863 / 0 / 156                                                | 4558 / 0 / 310                                                |
| Goodness-of-fit on F <sup>2</sup>            | 0.999                                          | 0.971                                                         | 0.999                                                         |
| Final R indices [ <i>I</i> > 2σ( <i>I</i> )] | R1 = 0.0498<br>wR2 = 0.1015                    | R1 = 0.0808<br>wR2 = 0.1923                                   | R1 = 0.0687<br>wR2 = 0.1451                                   |
| Extinction coefficient                       | 0.0037(8)                                      | 0.083(13)                                                     | 0.0012(2)                                                     |
| Largest diff. peak / hole, e.Å <sup>-3</sup> | 0.173 and -0.219                               | 0.291 and -0.332                                              | 0.336 and -0.311                                              |

**Table S15:** Crystal data and structure refinement for **2a**, **2b**, **2d** and **2e**.

|                                              | <b>2a</b>                                      | <b>2b</b>                                                     | <b>2d</b>                                                     | <b>2e</b>                                      |
|----------------------------------------------|------------------------------------------------|---------------------------------------------------------------|---------------------------------------------------------------|------------------------------------------------|
| Empirical formula                            | C <sub>24</sub> H <sub>18</sub> O <sub>2</sub> | C <sub>26</sub> H <sub>16</sub> F <sub>6</sub> O <sub>2</sub> | C <sub>26</sub> H <sub>16</sub> F <sub>6</sub> O <sub>2</sub> | C <sub>26</sub> H <sub>20</sub> O <sub>4</sub> |
| Formula weight                               | 338.38                                         | 474.39                                                        | 474.39                                                        | 396.42                                         |
| Temperature (K)                              | 290(2)                                         | 290(2)                                                        | 290(2)                                                        | 290(2)                                         |
| Wavelength (Å)                               | 0.71073                                        | 0.71073                                                       | 0.71073                                                       | 0.71073                                        |
| Crystal system                               | Monoclinic                                     | Monoclinic                                                    | Monoclinic                                                    | Triclinic                                      |
| Space group                                  | C 2/c                                          | C 2/c                                                         | P 2 <sub>1</sub> /c                                           | P $\bar{1}$                                    |
| a(Å)                                         | 15.569(5)                                      | 23.880(19)                                                    | 11.1094(18)                                                   | 8.14(8)                                        |
| b(Å)                                         | 11.084(3)                                      | 10.813(8)                                                     | 13.026(2)                                                     | 8.41(9)                                        |
| c(Å)                                         | 10.773(3)                                      | 8.582(7)                                                      | 7.5574(12)                                                    | 9.10(9)                                        |
| $\alpha$ (°)                                 | 90                                             | 90                                                            | 90                                                            | 64.74(9)                                       |
| $\beta$ (°)                                  | 101.868(4)                                     | 100.551(8)                                                    | 97.468(2)                                                     | 89.93(11)                                      |
| $\gamma$ (°)                                 | 90                                             | 90                                                            | 90                                                            | 66.50(10)                                      |
| Volume(Å <sup>3</sup> )                      | 1819.5(10)                                     | 2178(3)                                                       | 1084.4(3)                                                     | 506(9)                                         |
| Z                                            | 4                                              | 4                                                             | 2                                                             | 1                                              |
| Density (calc) (g/cm <sup>3</sup> )          | 1.235                                          | 1.446                                                         | 1.453                                                         | 1.301                                          |
| Absorp. Coeff. (mm <sup>-1</sup> )           | 0.077                                          | 0.125                                                         | 0.126                                                         | 0.087                                          |
| F(000)                                       | 712                                            | 968                                                           | 484                                                           | 208                                            |
| Crystal size (mm <sup>3</sup> )              | 0.34x0.25x0.21                                 | 0.40x0.32x0.31                                                | 0.36x0.28x0.22                                                | 0.36x0.28x0.22                                 |
| Index ranges                                 | -15 ≤ h ≤ 19<br>-13 ≤ k ≤ 13<br>-13 ≤ l ≤ 13   | -28 ≤ h ≤ 28<br>-12 ≤ k ≤ 11<br>-10 ≤ l ≤ 10                  | -12 ≤ h ≤ 13<br>-13 ≤ k ≤ 15<br>-8 ≤ l ≤ 8                    | -9 ≤ h ≤ 9<br>-9 ≤ k ≤ 9<br>-10 ≤ l ≤ 10       |
| Reflections collected                        | 6625                                           | 6198                                                          | 6176                                                          | 2921                                           |
| Independent reflections                      | 1854<br>[R(int)=0.0225]                        | 1904<br>[R(int)=0.0425]                                       | 1880<br>[R(int)=0.0940]                                       | 1705<br>[R(int)=0.3633]                        |
| Data/restraints/parameters                   | 1854/0/119                                     | 1904 / 0 / 156                                                | 1880/12/180                                                   | 1705/117/158                                   |
| Goodness-of-fit on F <sup>2</sup>            | 1.050                                          | 1.119                                                         | 1.087                                                         | 0.653                                          |
| Final R indices [ <i>I</i> > 2σ( <i>I</i> )] | R1 = 0.0455<br>wR2 = 0.1123                    | R1 = 0.0965<br>wR2 = 0.2323                                   | R1 = 0.0688<br>wR2 = 0.1568                                   | R1 = 0.0732<br>wR2 = 0.0892                    |
| Larg. diff. peak/hole, e.Å <sup>-3</sup>     | 0.126 / -0.167                                 | 0.531 / -0.278                                                | 0.271 / -0.315                                                | 0.176 / -0.211                                 |

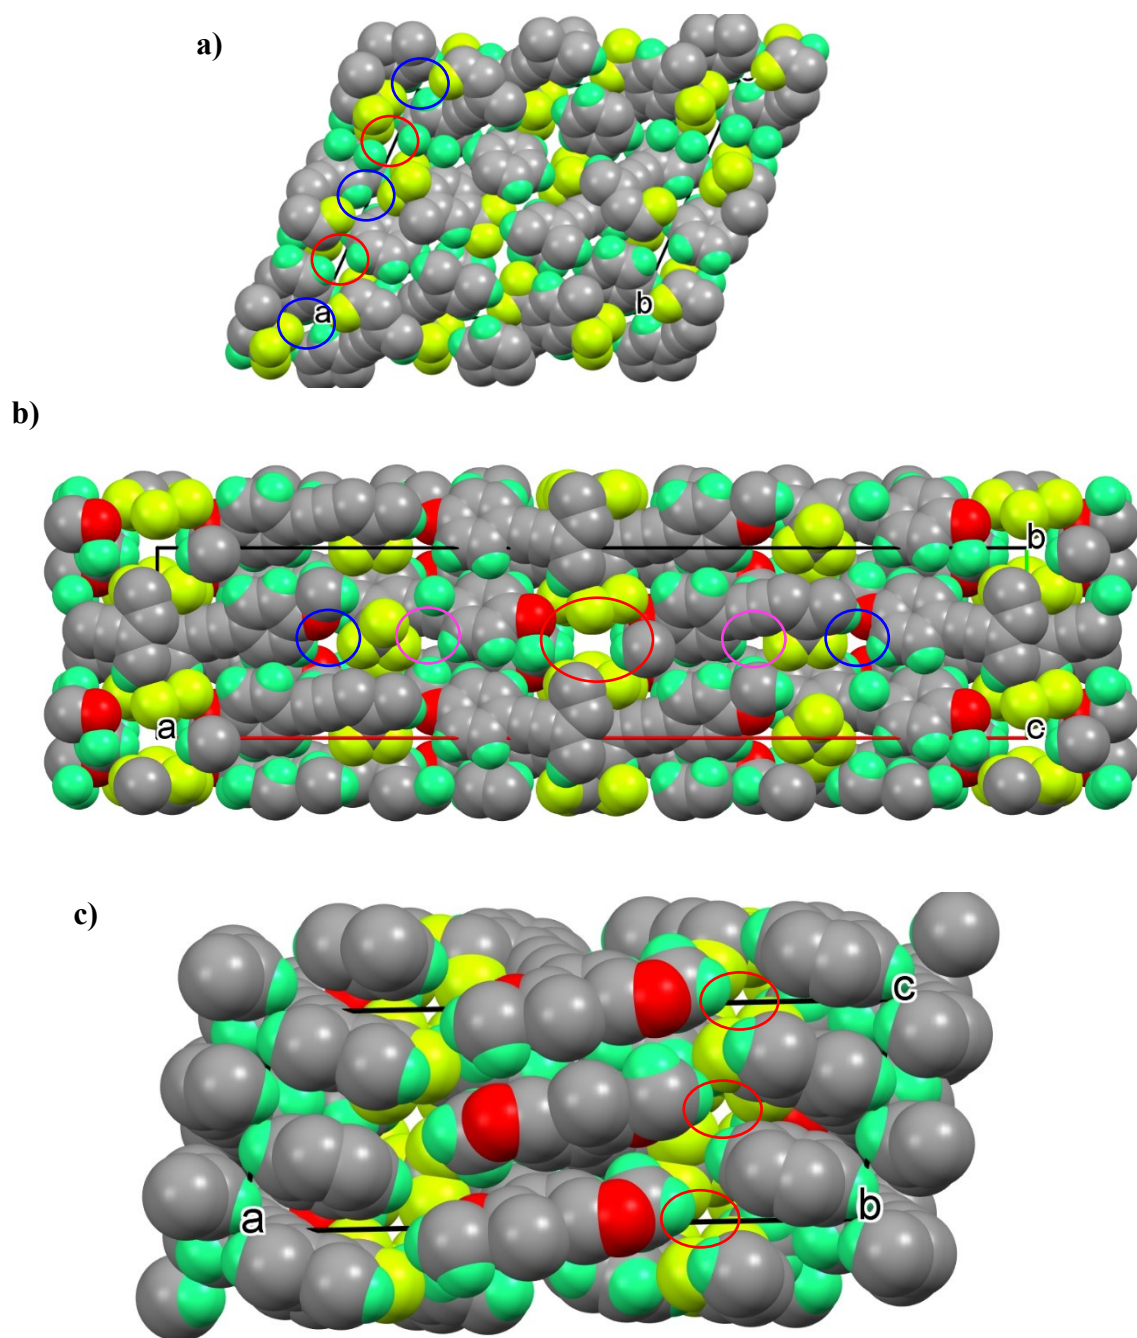

**Figure S7:** a) View down  $b$  axis of channels in the packing of compound **1a**. Representatives channels A and B are marked in red and blue circles, respectively. The longest axis of the unit cell is  $a$  axis. b) View down  $c$  axis of channels in the packing of compound **1e**. Representatives channels A, B and C are marked in red, blue and pink circles, respectively. The longest axis of the unit cell is  $a$  axis. c) View down  $b$  axis of channels in packing of compound **2b**. Representatives channels are marked in red. The longest axis of the unit cell is  $a$  axis.

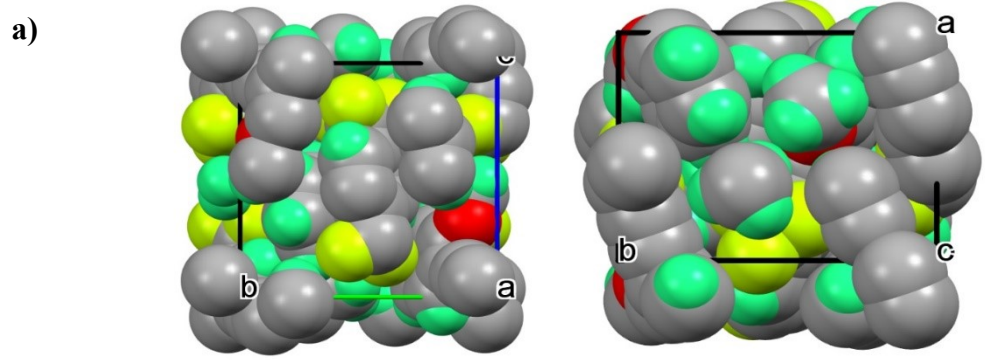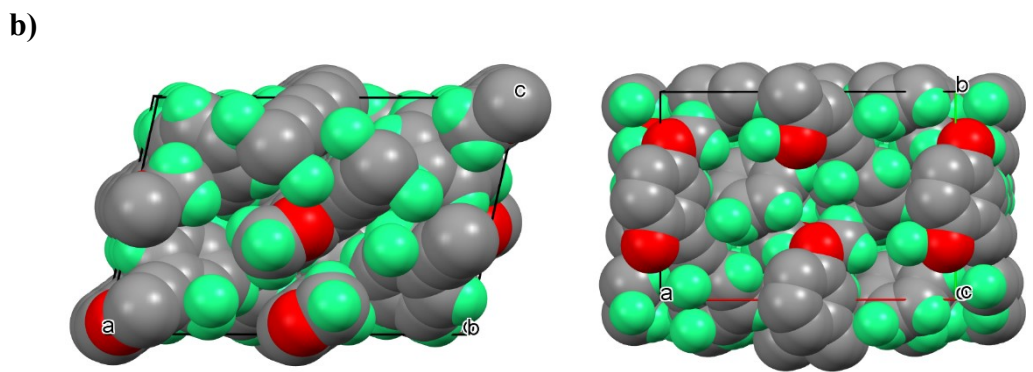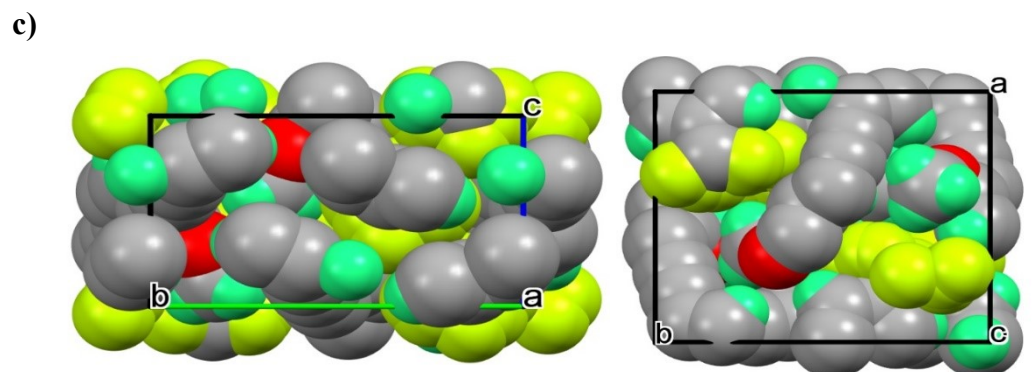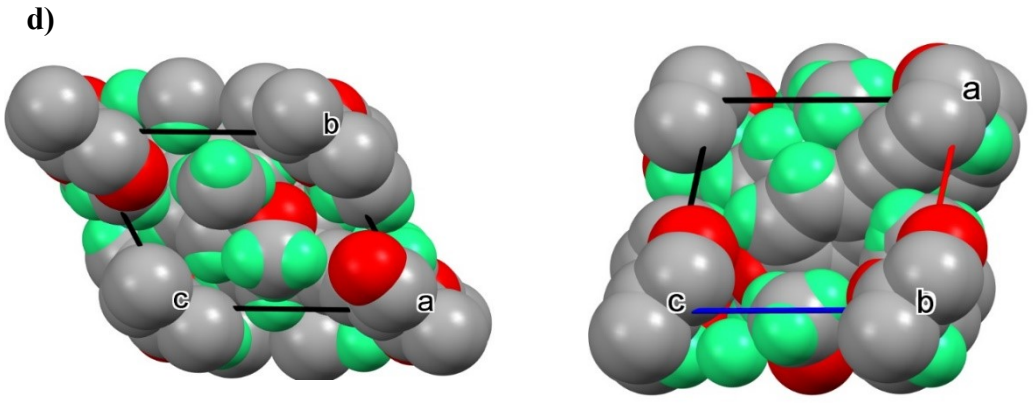

**Figure S8.** Packings without internal channels of a) **1c**. View down *a* and *c* axis. The longest axis of the unit cell is the *b* axis. b) **2a**. View down *b* and *c* axis. The longest axis of the unit cell is the *a* axis. c) **2d**. View down *a* and *c* axis. The longest axis of the unit cell is the *b* axis. d) **2e**. View down *a* and *b* axis. The longest axis of the unit cell is the *c* axis.

**Table S16:** Intermolecular contacts and channel size of compounds **1a**, **1e** y **2b**.

| Channel            | Distance (Å) |      | Size (Å)                       |      |
|--------------------|--------------|------|--------------------------------|------|
| <i>Compound 1a</i> |              |      |                                |      |
| <b>A</b>           | F1···H4      | 2.70 | Plane(F1-H4)-plane(F1-H4)      | 4.64 |
|                    | F3···H3      | 2.77 | Plane(F3-H4)-plane(F3-H4)      | 3.73 |
| <b>B</b>           | F2···H4      | 2.82 | Plane(F2-H4)-plane(F2-H4)      | 3.96 |
|                    | F2···H5      | 3.33 | Plane(H4-H5)-plane(H4-H5)      | 2.50 |
| <i>Compound 1e</i> |              |      |                                |      |
| <b>A</b>           | F3···H20B    | 2.67 | Plane H20B-plane H20B          | 4.48 |
|                    |              |      | Plane F3-plane F3              | 3.38 |
| <b>B</b>           | O1···H25     | 2.53 | Plane(O1-H25)-Plane (O1-H25)   | 3.29 |
|                    | F4···H25     | 2.35 | Plane (H2)-Plane(F4)           | 3.74 |
| <b>C</b>           | F6···H7C     | 2.62 | Plane (H16)-Plane(F5)          | 3.61 |
|                    | C21...H7A    | 2.81 | Plane(C21-C22)-Plane(C21-C22)  | 3.70 |
| <i>Compound 2b</i> |              |      |                                |      |
|                    | F3···H13C    | 3.54 | Plane(F1-H13C)-plane (F1-H13C) | 3.00 |
|                    | F1···H13C    | 2.67 | Plane (F1-F3)-Plane(F1-F3)     | 3.66 |

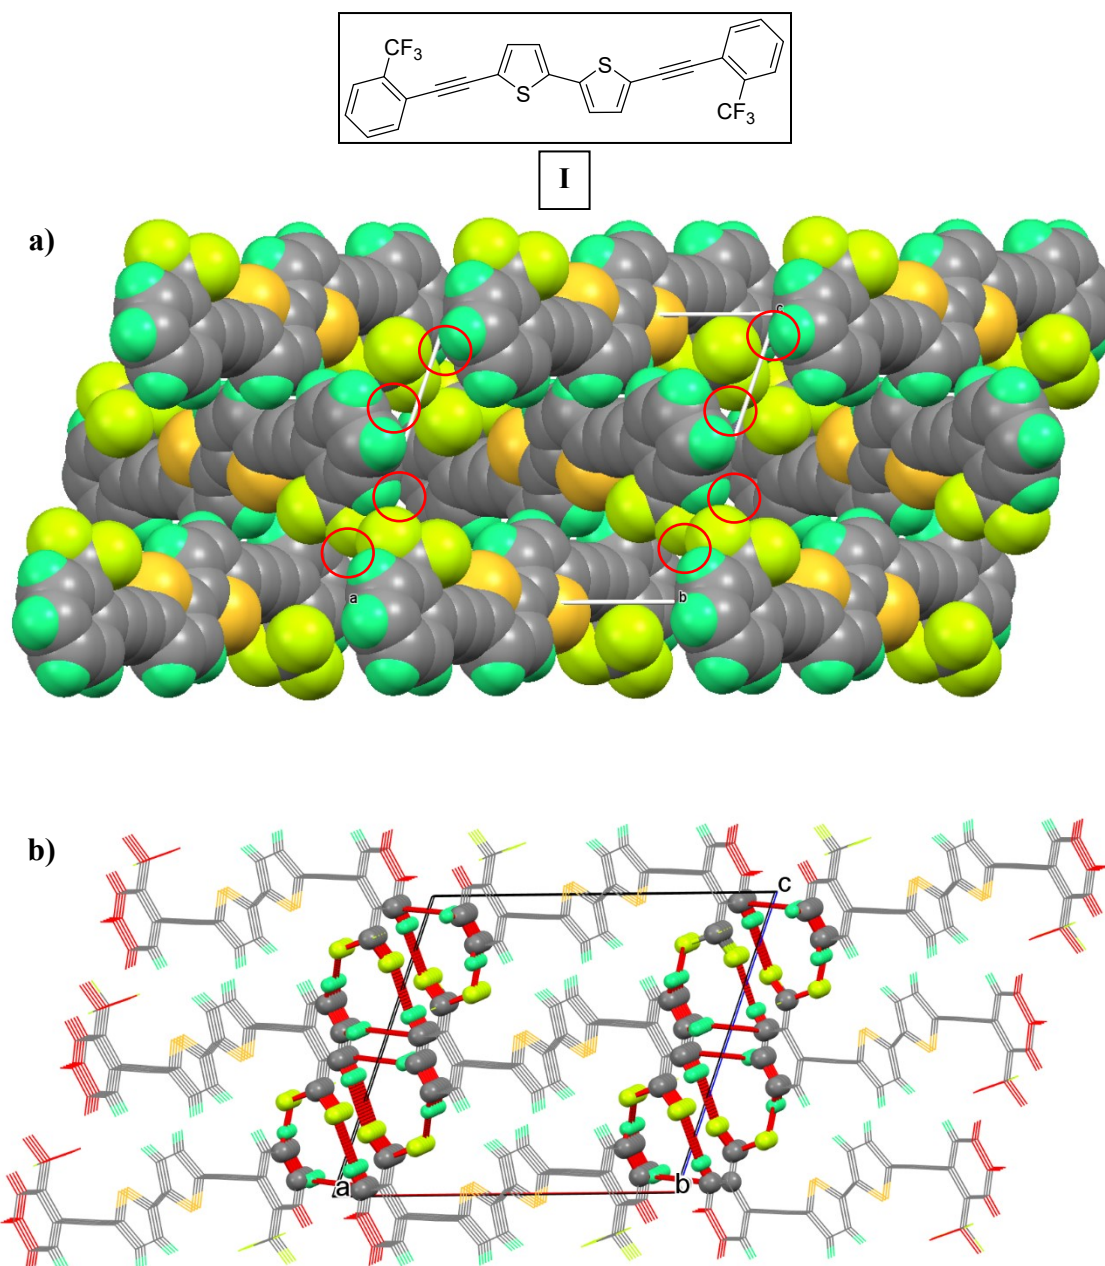

**Figure S9:** Packing molecular of compound **I** with the internal channels view down *b* axis a) with the atoms in their Van der Waals radii and b) with the atoms in wireframe style. The channels are marked in colour red. The longest axis of the unit cell is the *a* axis. Reference 49 in the manuscript. CCDC: DEBJED

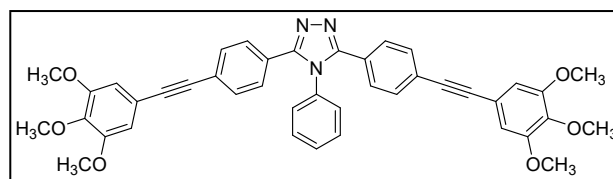

**II**

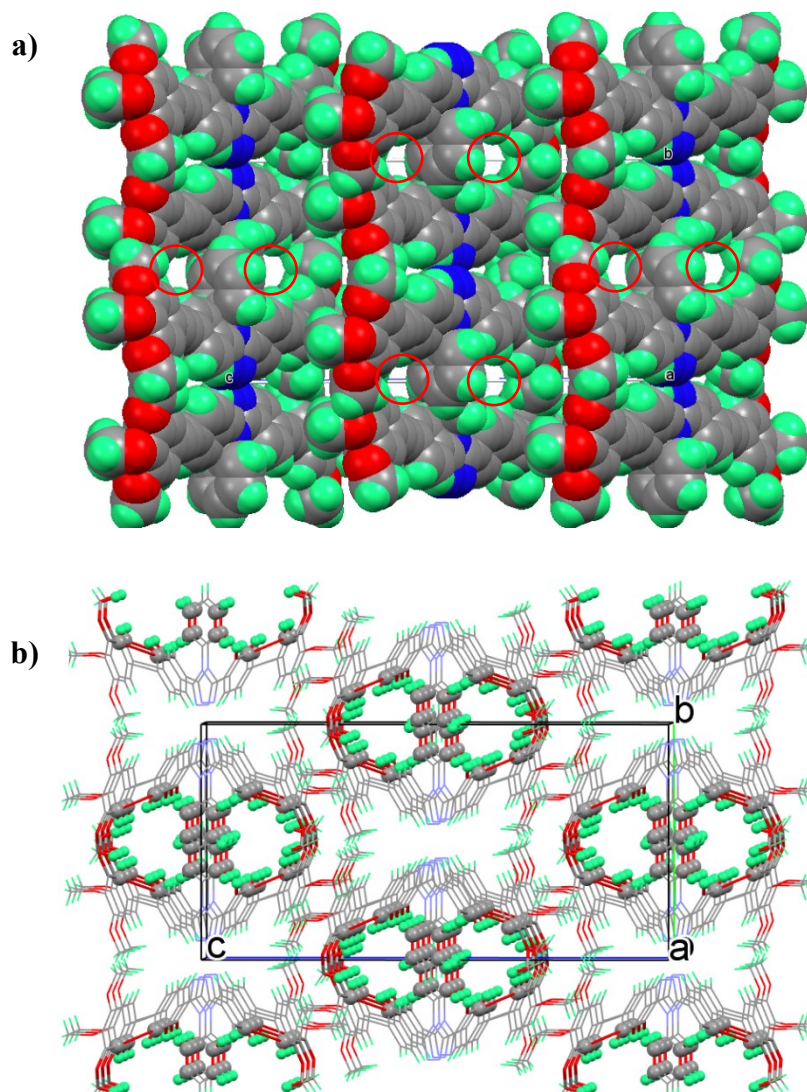

**Figure S10:** Packing molecular of compound **II** with the internal channels view down  $a$  axis a) with the atoms in their Van der Waals radii and b) with the atoms in wireframe style. The channels are marked in colour red. The longest axis of the unit cell is the  $c$  axis. Reference 43 in the manuscript. CCDC: XOWDIY

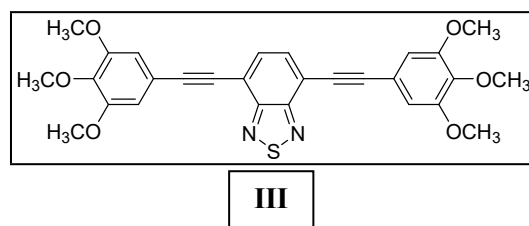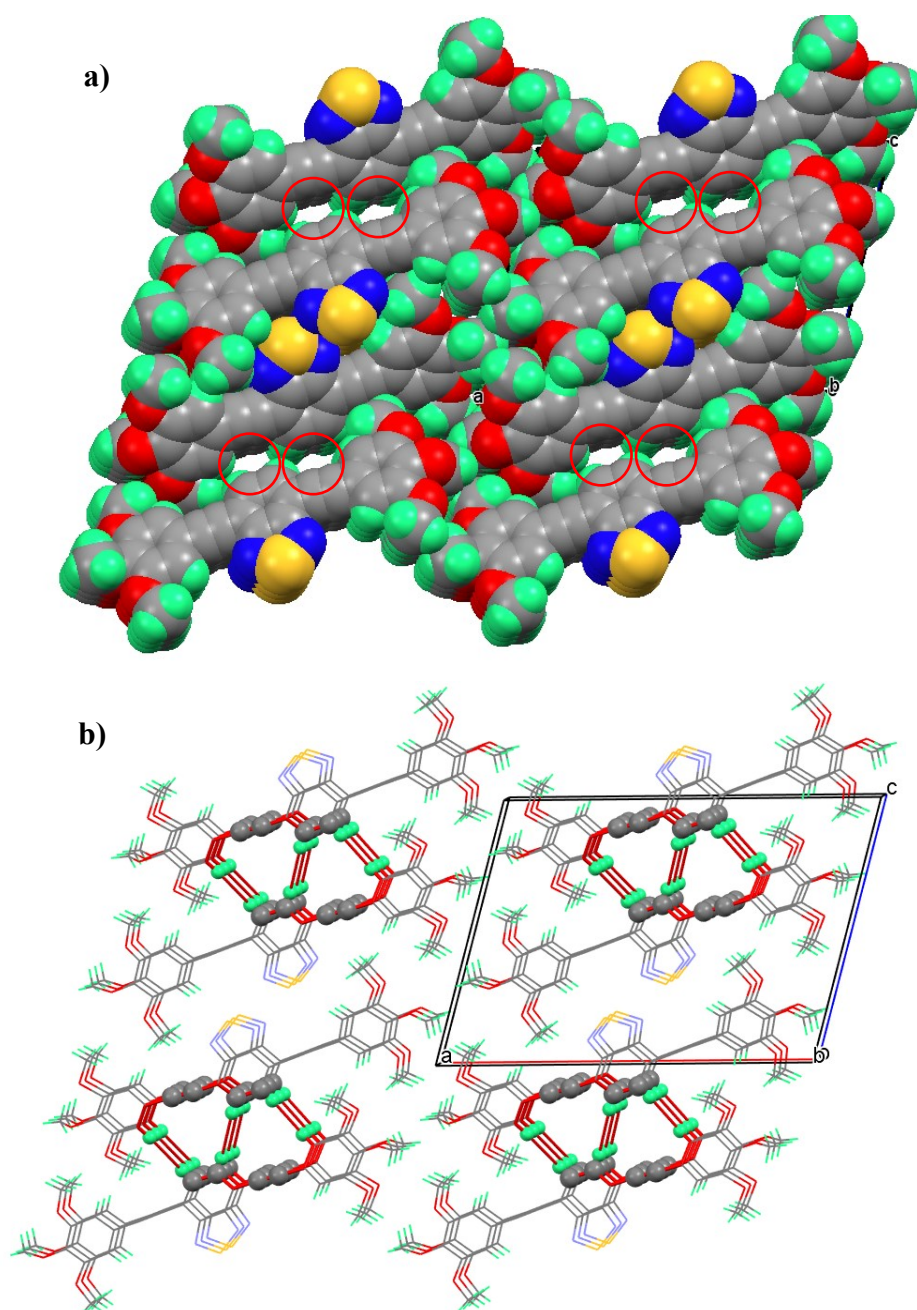

**Figure S11:** Packing molecular of compound **III** with the internal channels view down *b* axis a) with the atoms in their Van der Waals radii and b) with the atoms in wireframe



style. The channels are marked in colour red. The longest axis of the unit cell is the  $a$  axis. Reference 44 in the manuscript. CCDC: DEBMAC

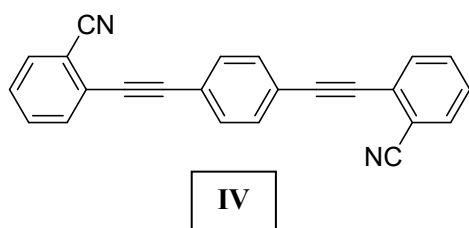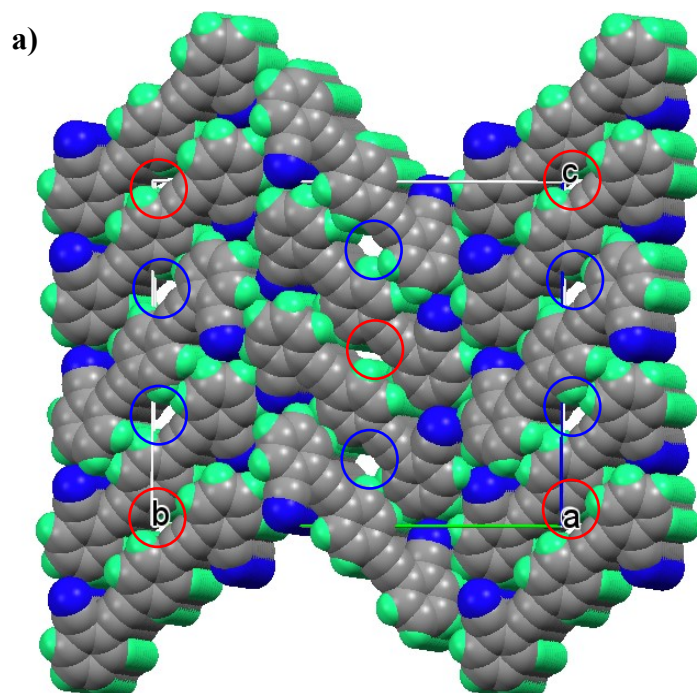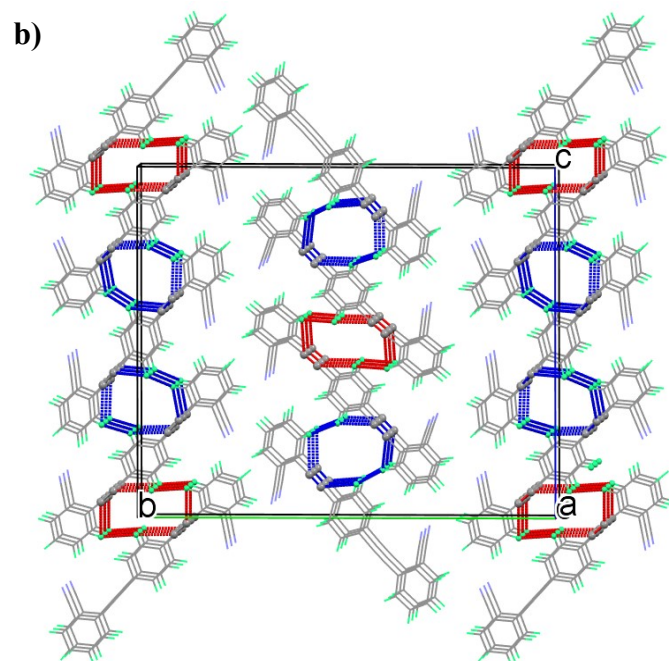

**Figure S12:** Packing molecular of compound IV with the internal channels view down  $a$

axis a) with the atoms in their Van der Waals radii and b) with the atoms in wireframe style. The channels are marked red and blue. The longest axis of the unit cell is the *b* axis. Reference 49 in the manuscript. CCDC: DAZXUB

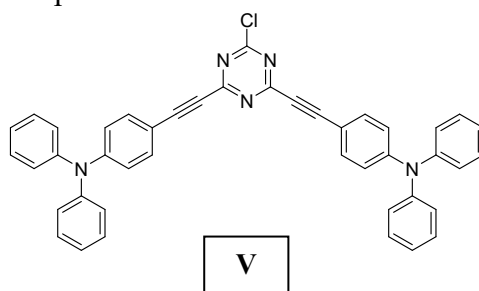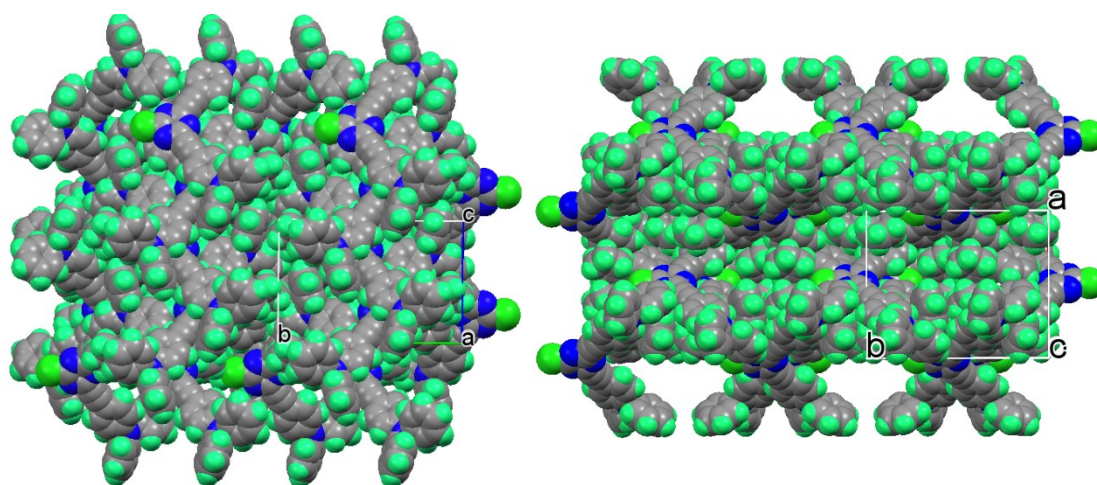

**Figure S13:** Packing molecular of compound V without internal channels view down *a* and *c* axis. The longest axis of the unit cell is the *b* axis. Reference 61 in the manuscript.

## 6. NMR spectra

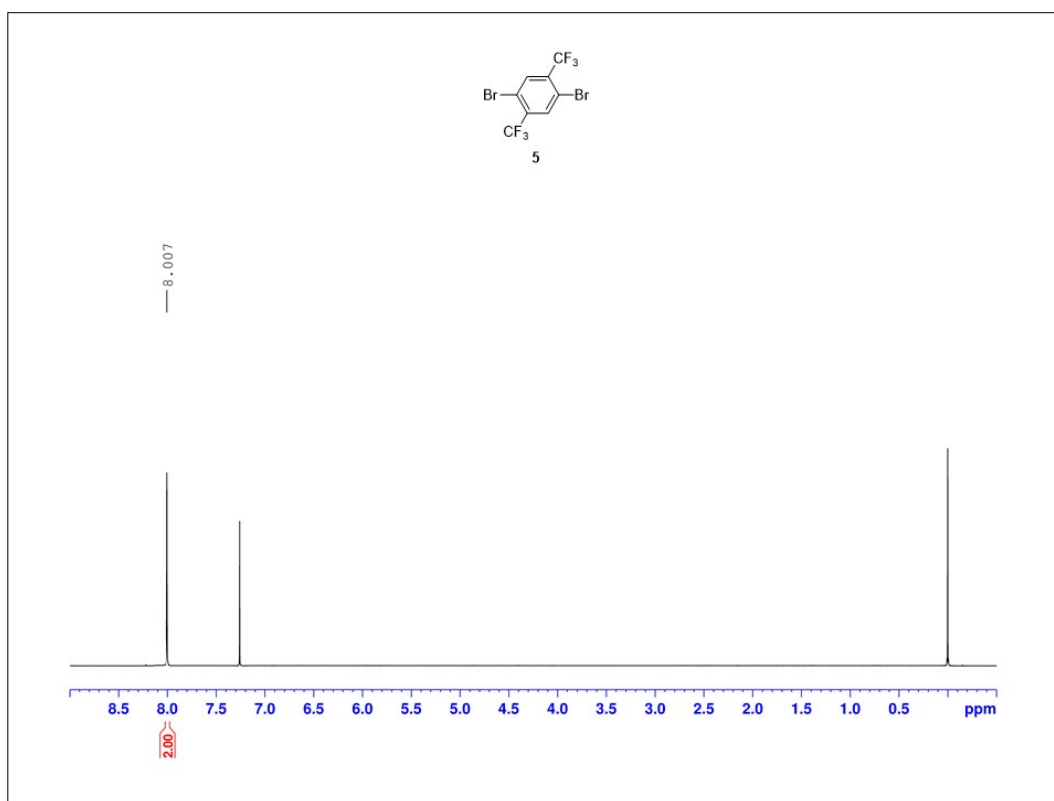

Figure S14:  $^1\text{H NMR}$  spectrum of compound **5** in  $\text{CDCl}_3$ .

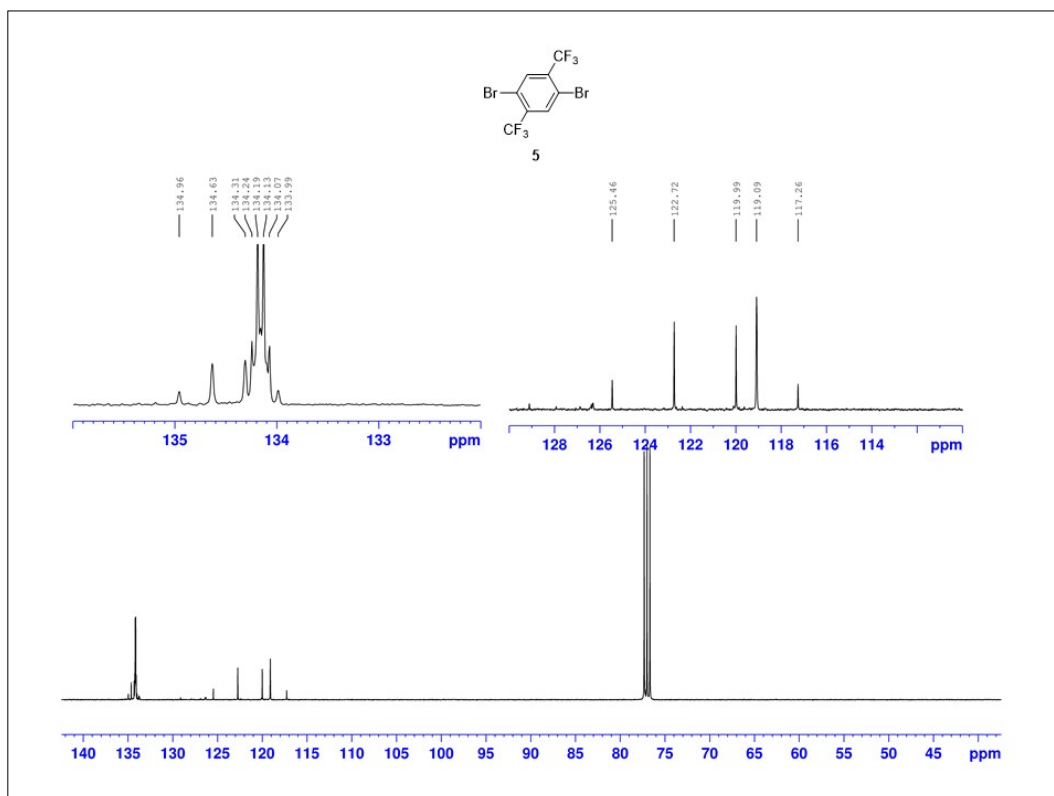

Figure S15:  $^{13}\text{C NMR}$  spectrum of compound **5** in  $\text{CDCl}_3$ .

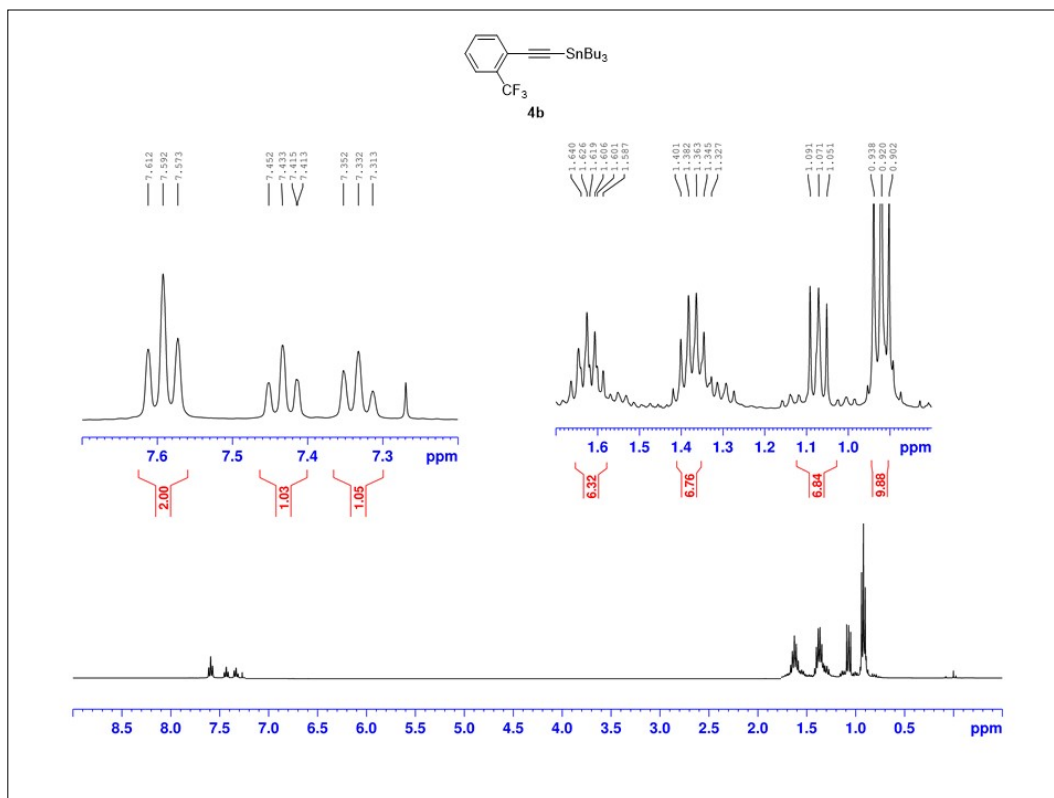

**Figure S16:**  $^1\text{H NMR}$  spectrum of compound **4b** in  $\text{CDCl}_3$ .

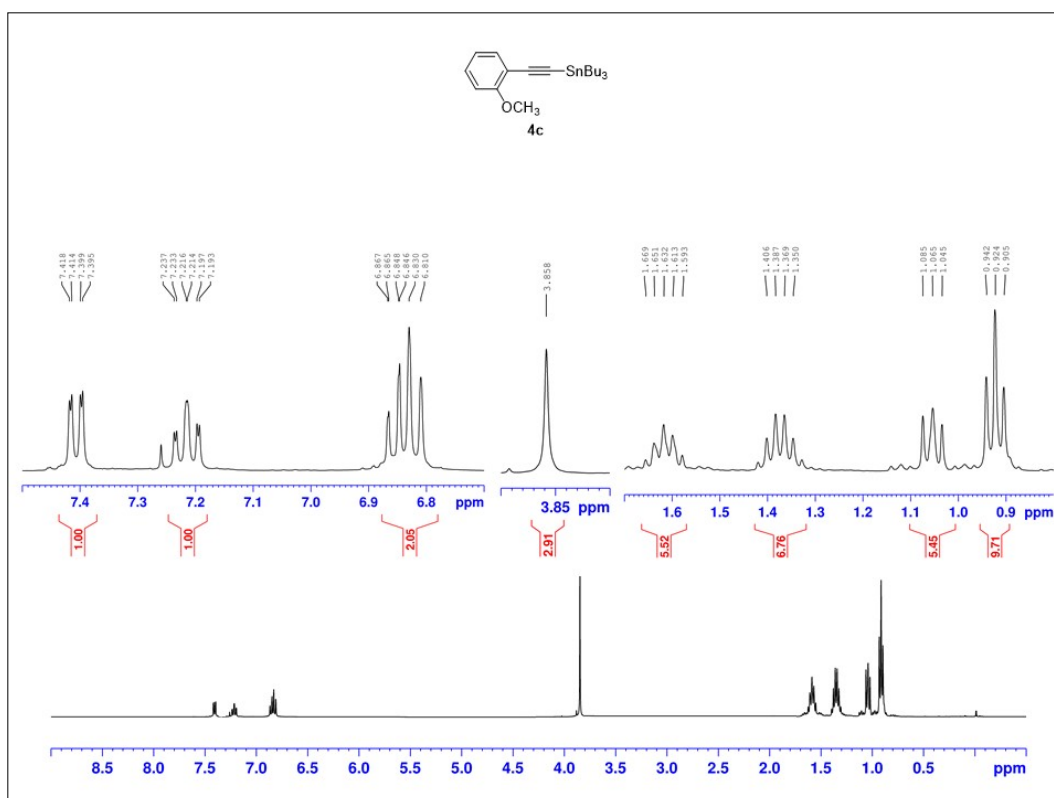

**Figure S17:**  $^1\text{H NMR}$  spectrum of compound **4c** in  $\text{CDCl}_3$ .

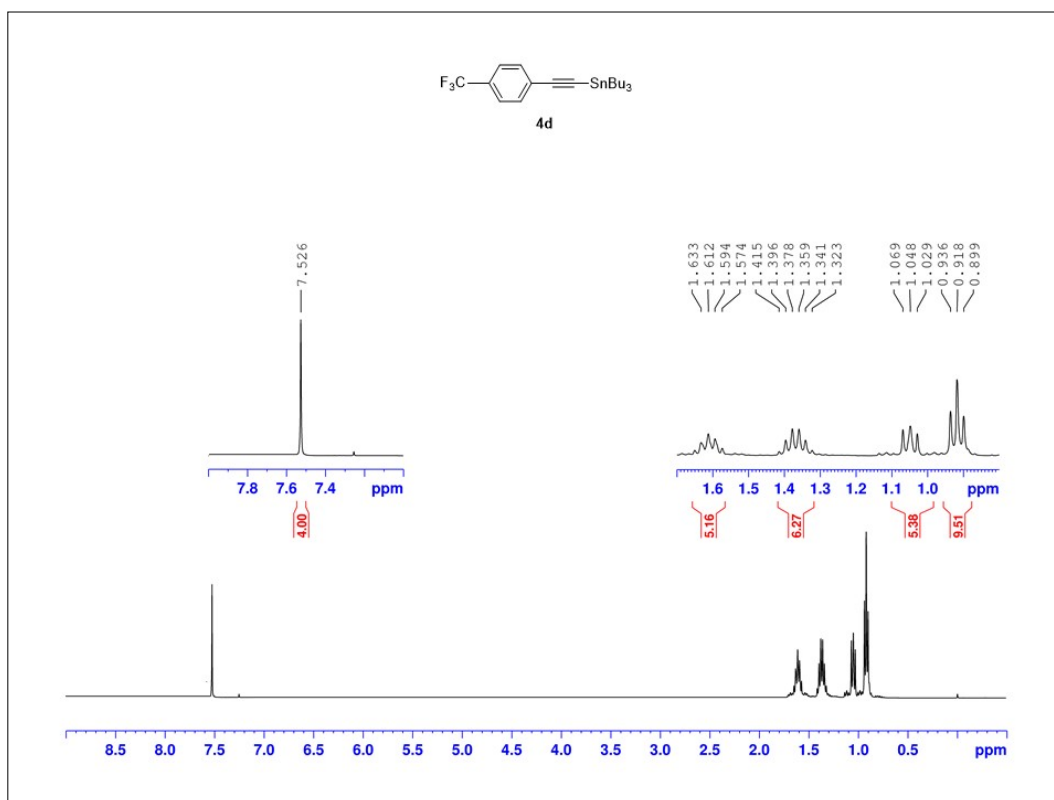

**Figure S18:**  $^1\text{H}$ NMR spectrum of compound **4d** in  $\text{CDCl}_3$ .

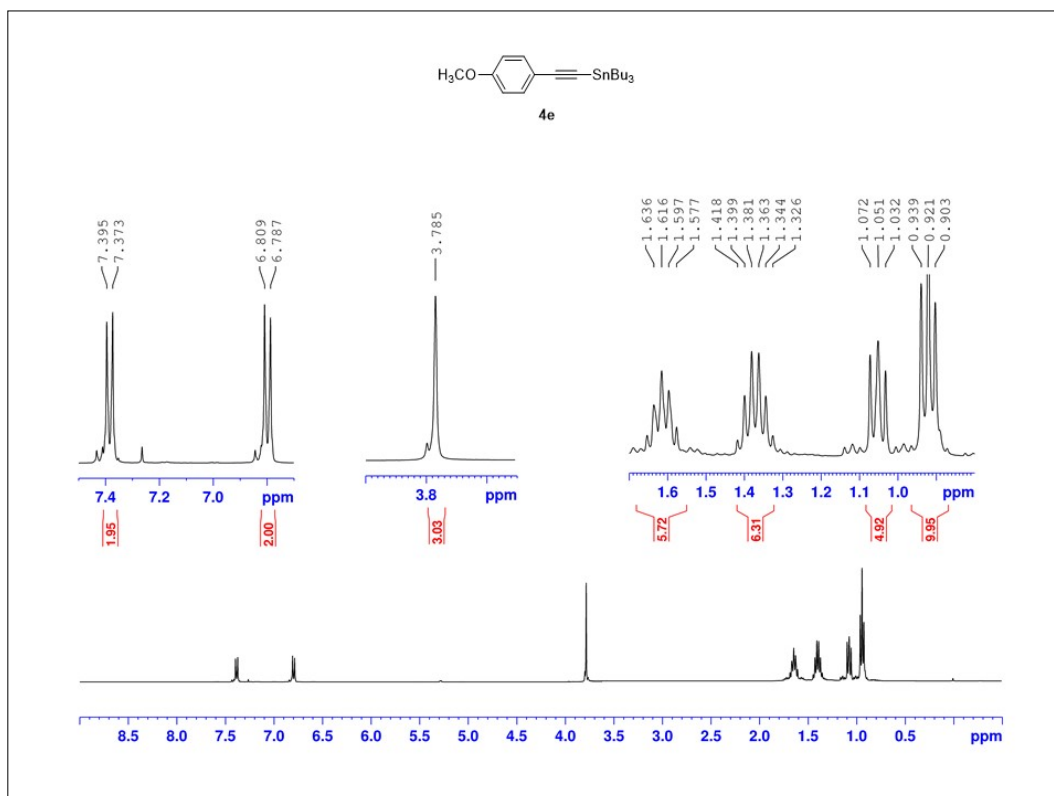

**Figure S19:**  $^1\text{H}$ NMR spectrum of compound **4e** in  $\text{CDCl}_3$ .

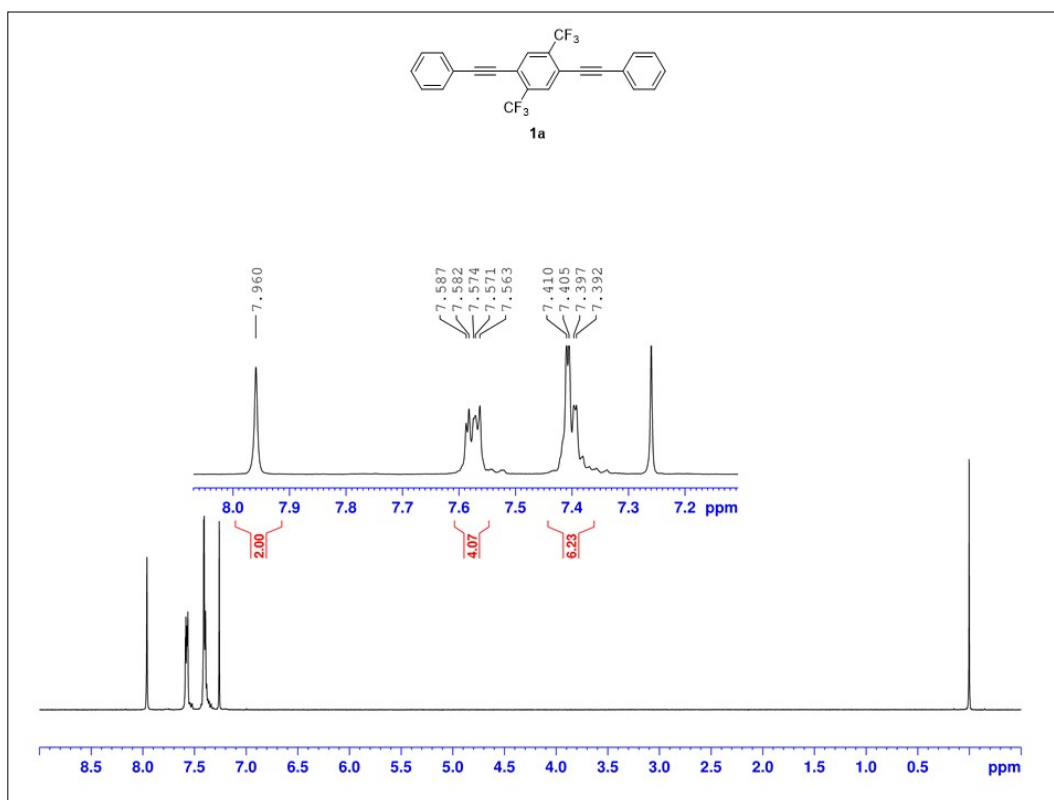

Figure S20: <sup>1</sup>H NMR spectrum of compound **1a** in CDCl<sub>3</sub>.

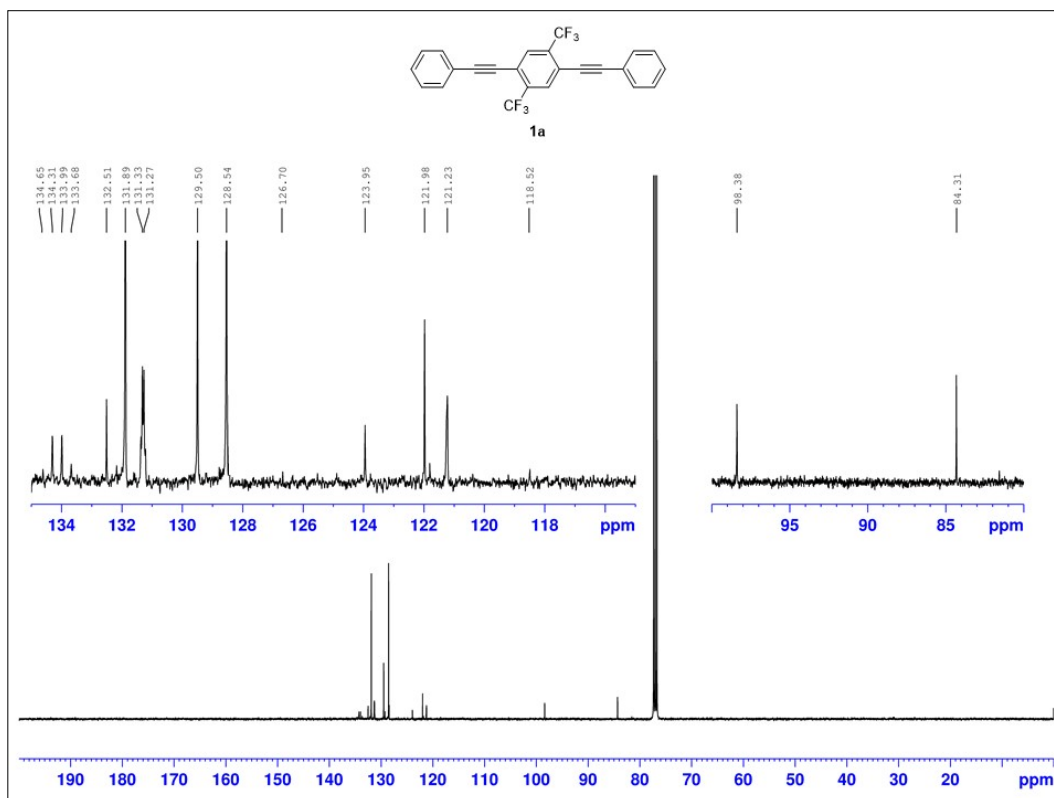

Figure S21: <sup>13</sup>C NMR spectrum of compound **1a** in CDCl<sub>3</sub>.

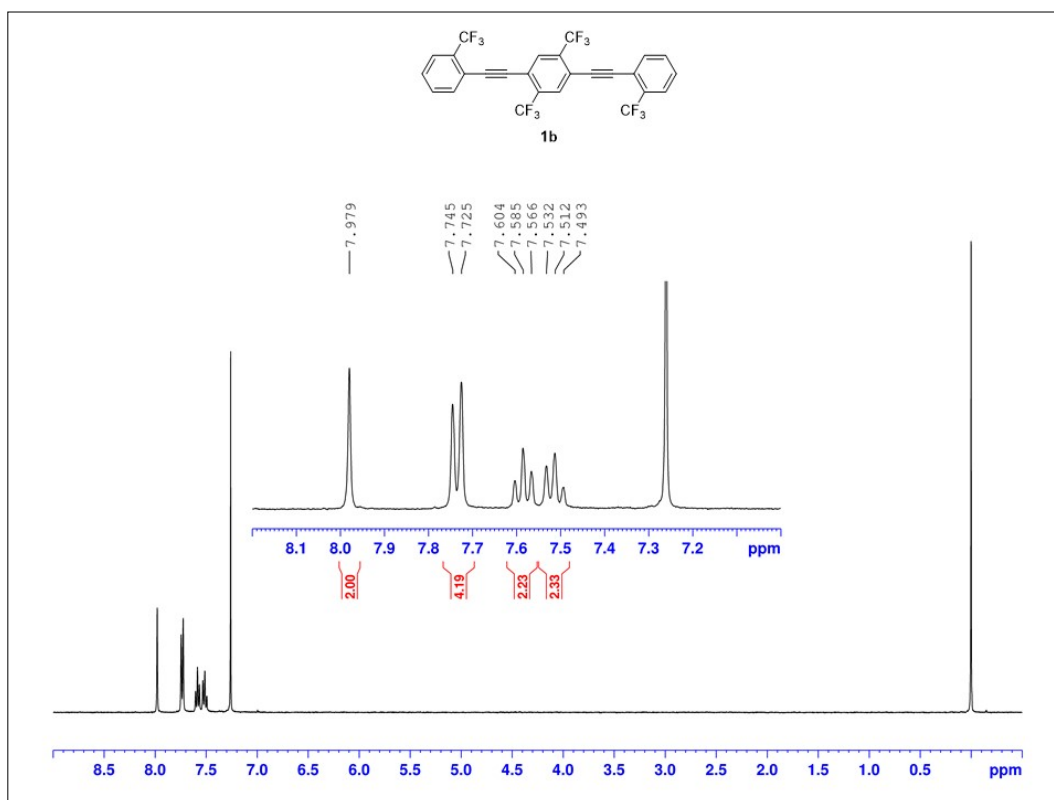

Figure S22:  $^1\text{H}$ NMR spectrum of compound **1b** in  $\text{CDCl}_3$ .

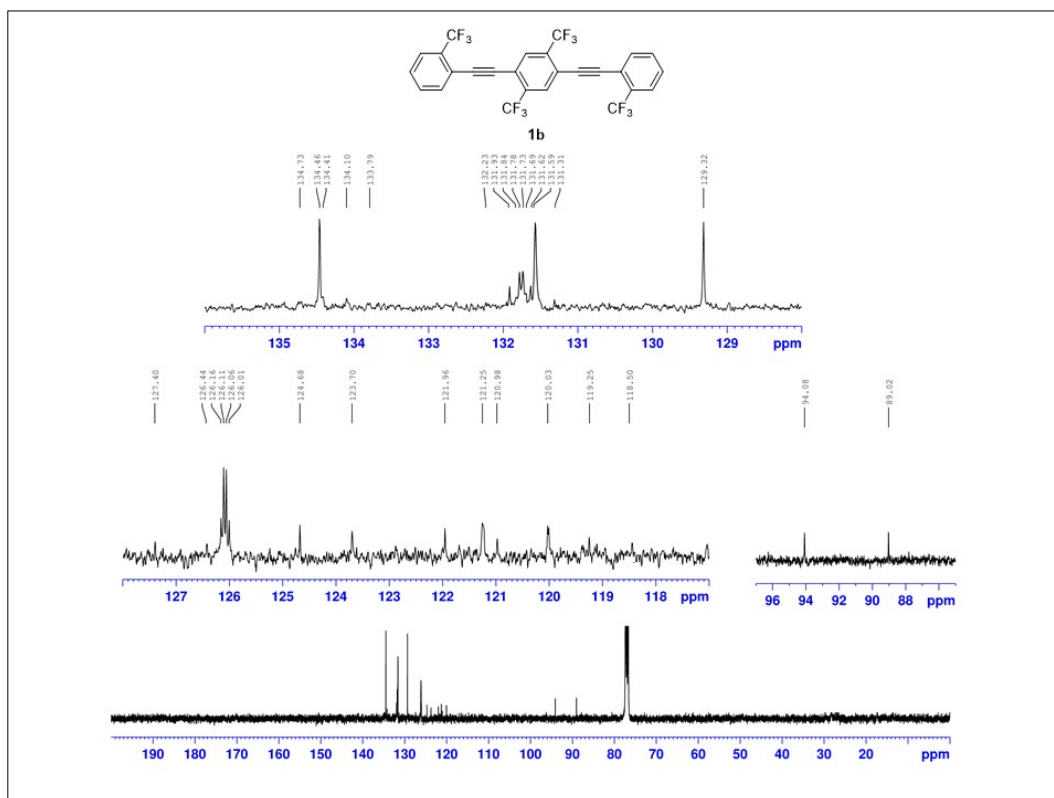

Figure S23:  $^{13}\text{C}$  NMR spectrum of compound **1b** in  $\text{CDCl}_3$ .

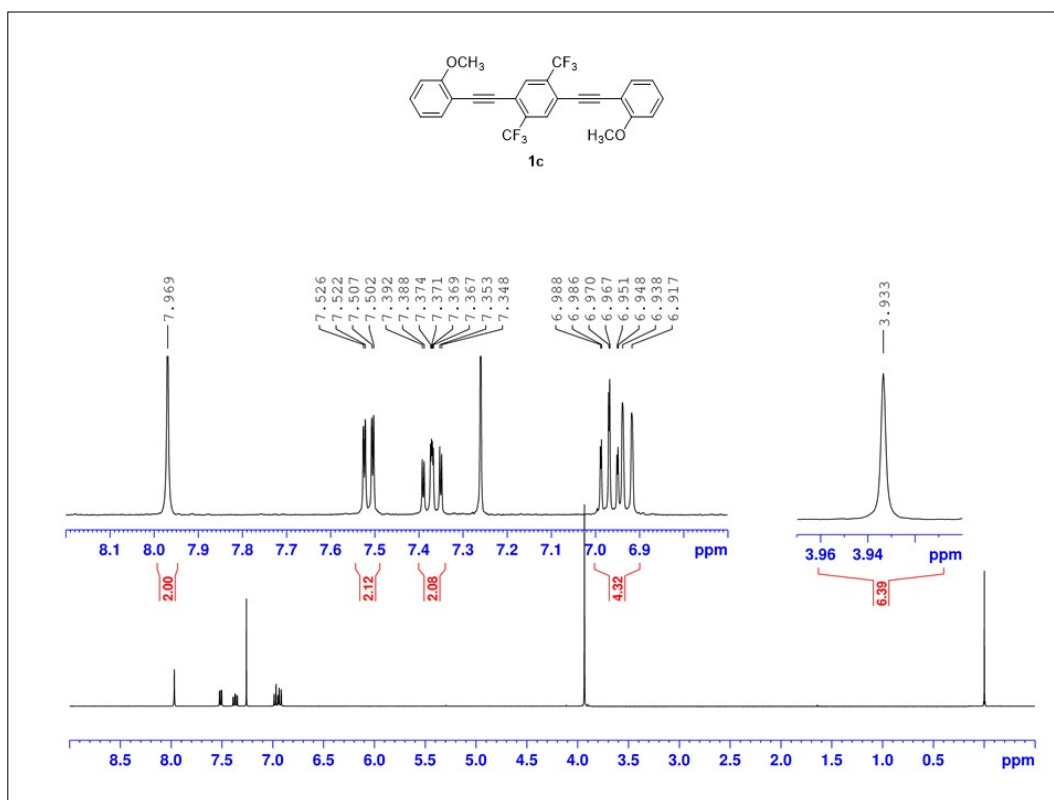

Figure S24: <sup>1</sup>H NMR spectrum of compound **1c** in CDCl<sub>3</sub>.

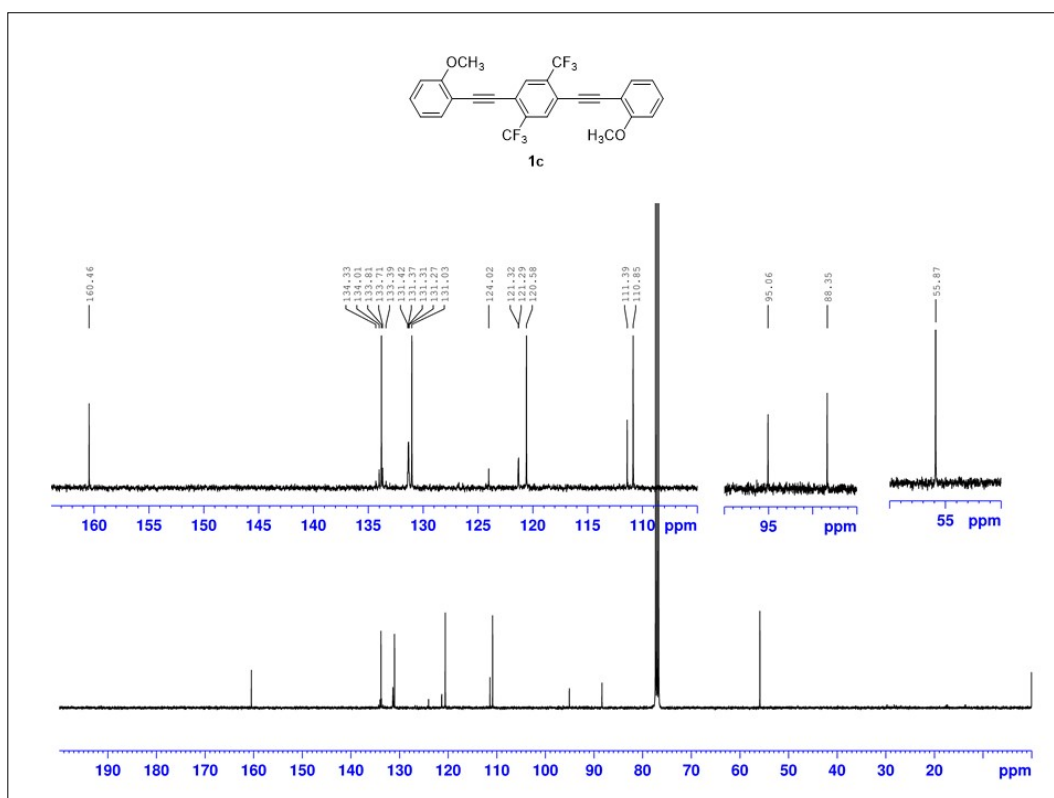

Figure S25: <sup>13</sup>C NMR spectrum of compound **1c** in CDCl<sub>3</sub>.



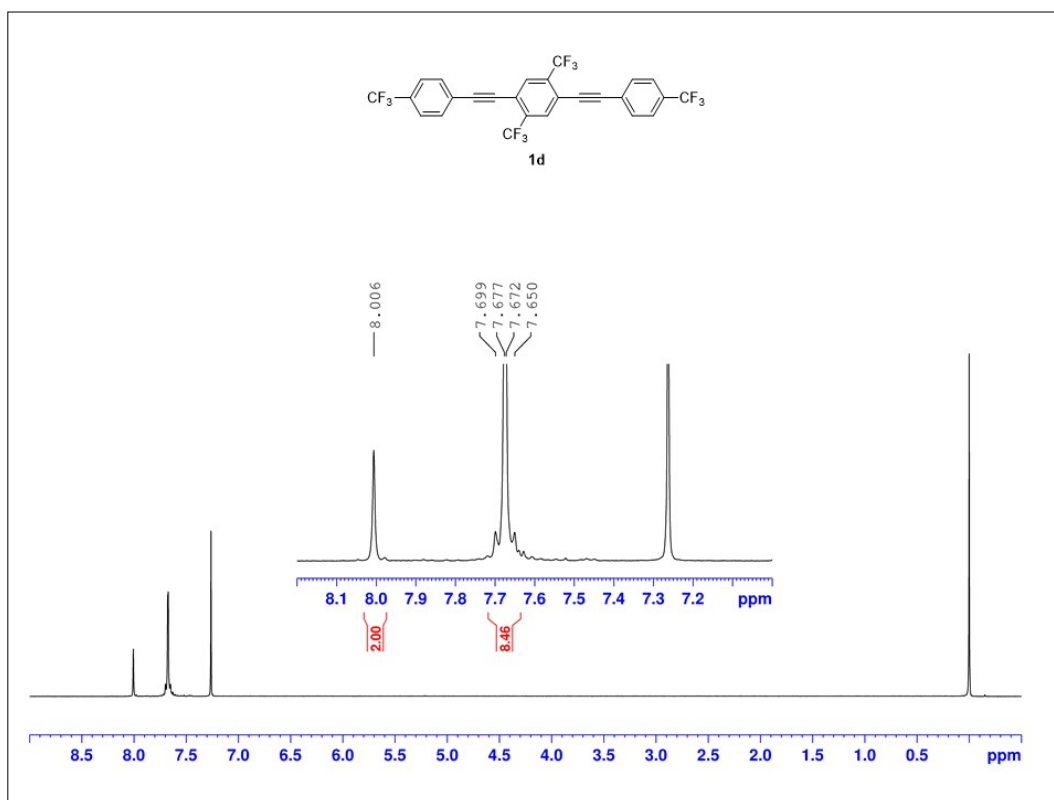

**Figure S26:** <sup>1</sup>H NMR spectrum of compound **1d** in CDCl<sub>3</sub>.

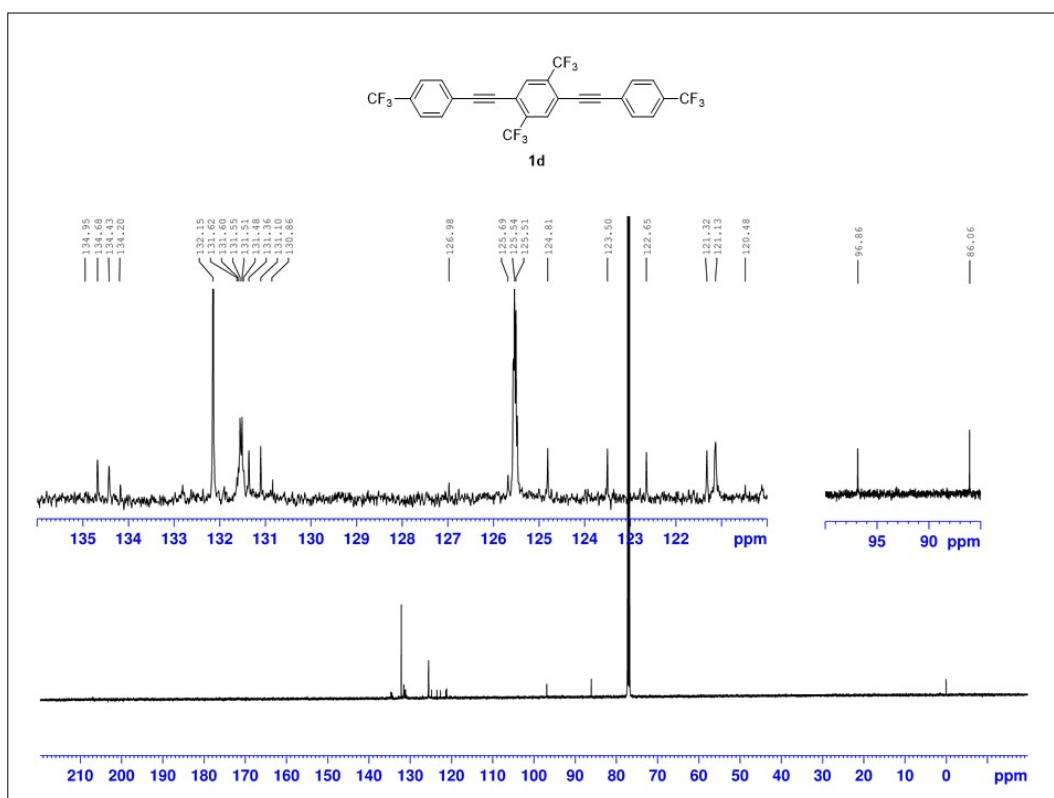

**Figure S27:** <sup>13</sup>C NMR spectrum of compound **1d** in CDCl<sub>3</sub>.

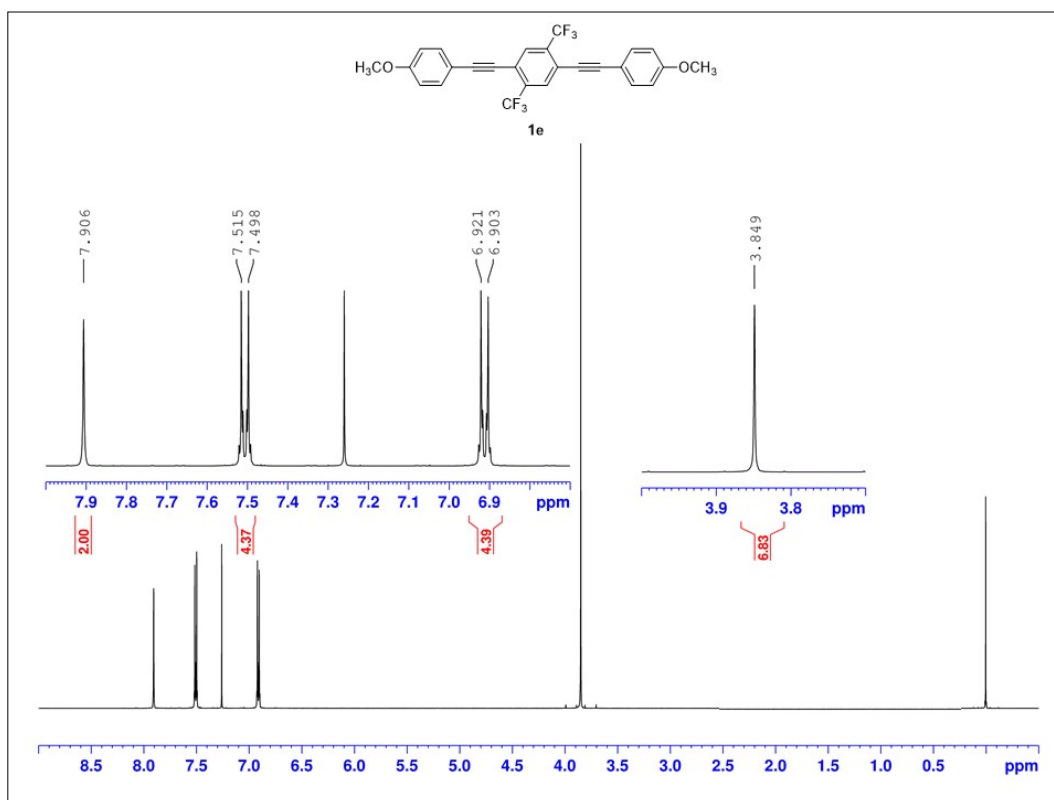

**Figure S28:** <sup>1</sup>H NMR spectrum of compound **1e** in CDCl<sub>3</sub>.

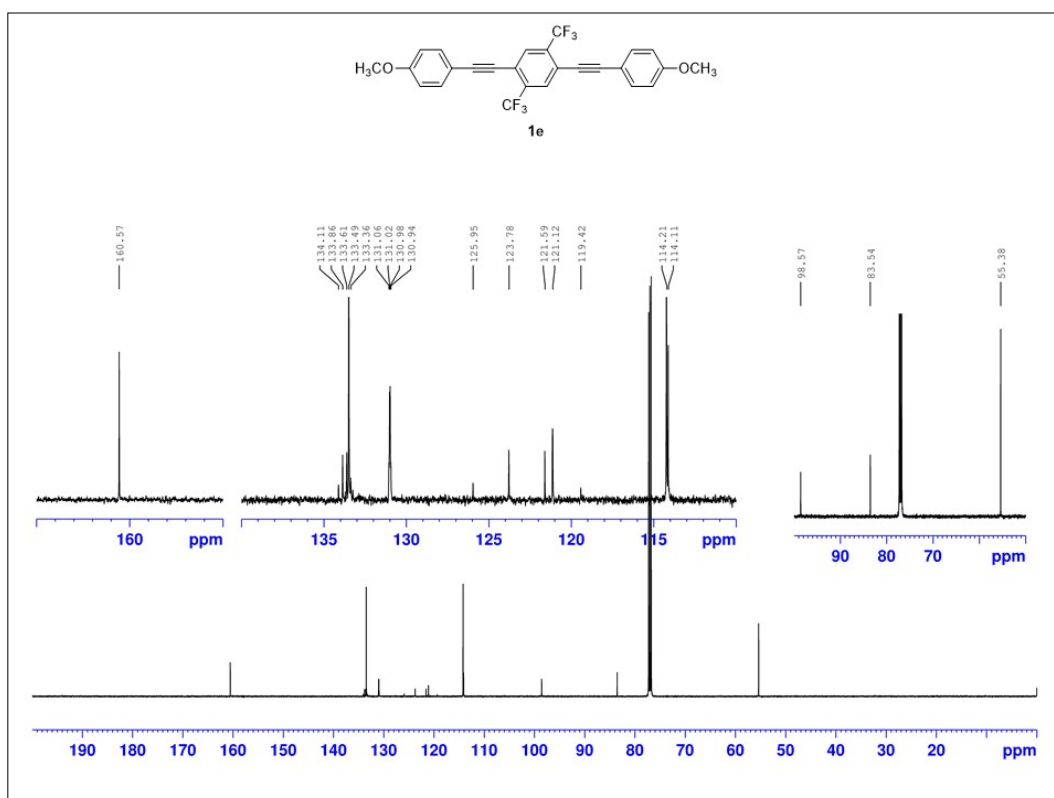

**Figure S29:** <sup>13</sup>C NMR spectrum of compound **1e** in CDCl<sub>3</sub>.

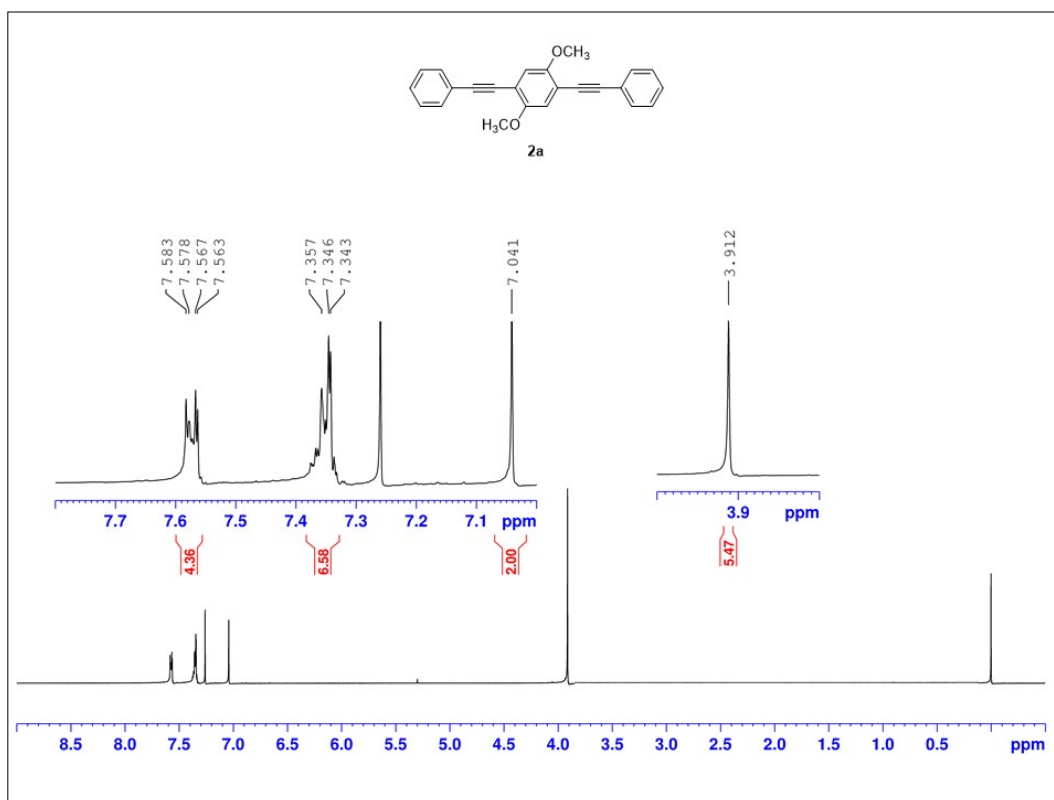

**Figure S30:** <sup>1</sup>H NMR spectrum of compound **2a** in CDCl<sub>3</sub>.

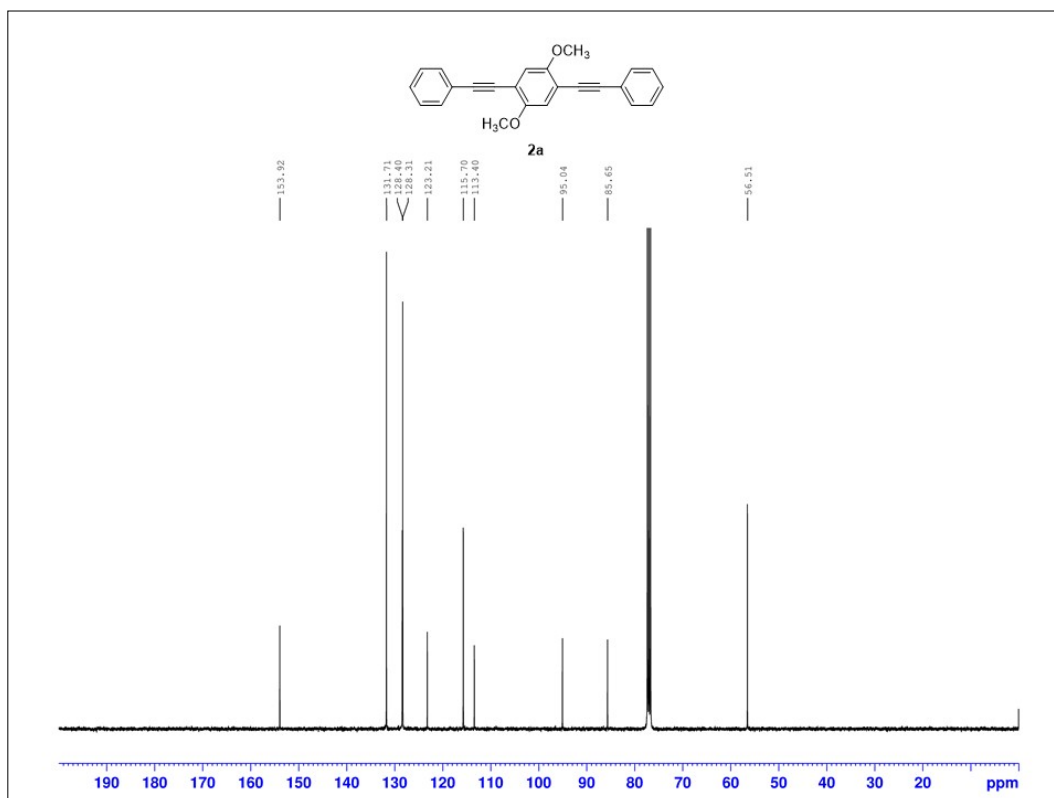

**Figure S31:** <sup>13</sup>C NMR spectrum of compound **2a** in CDCl<sub>3</sub>.

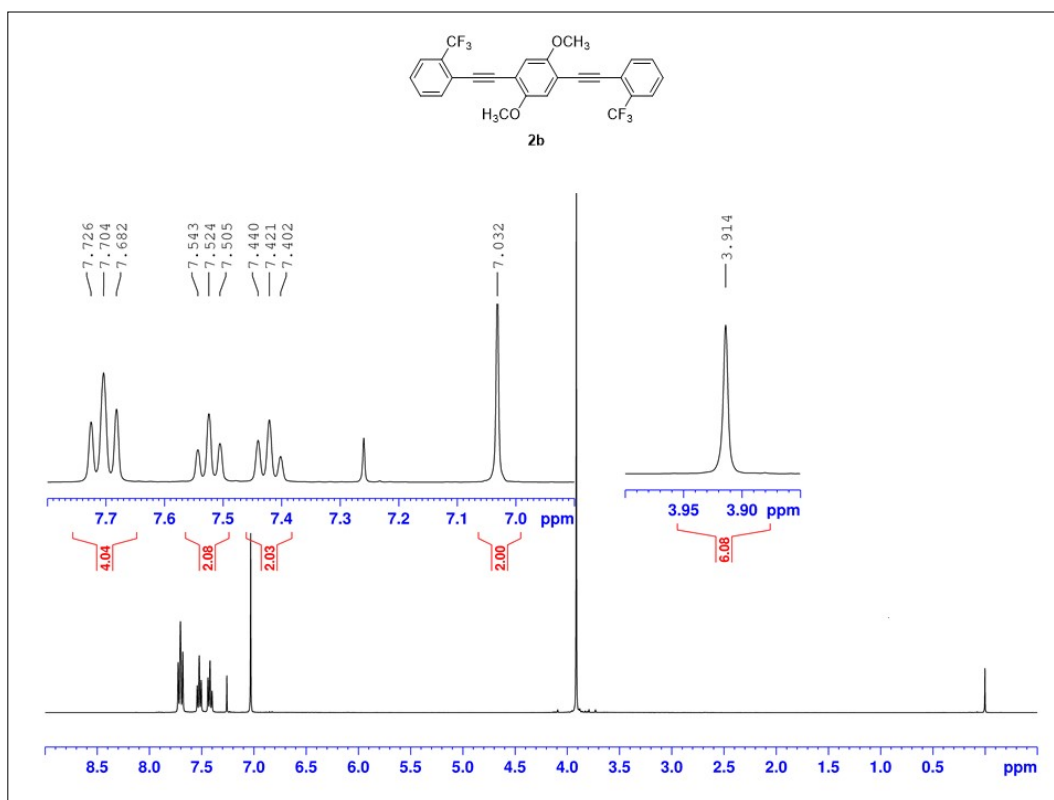

**Figure S32:** <sup>1</sup>H NMR spectrum of compound **2b** in CDCl<sub>3</sub>.

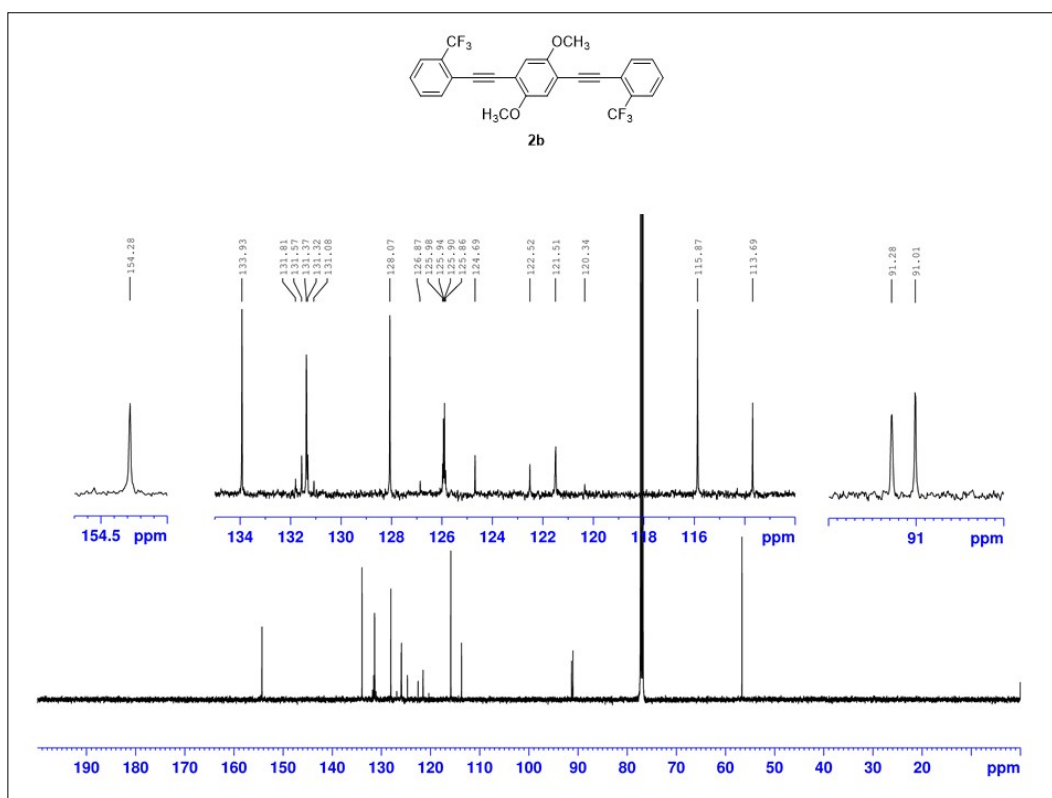

**Figure S33:** <sup>13</sup>C NMR spectrum of compound **2b** in CDCl<sub>3</sub>.

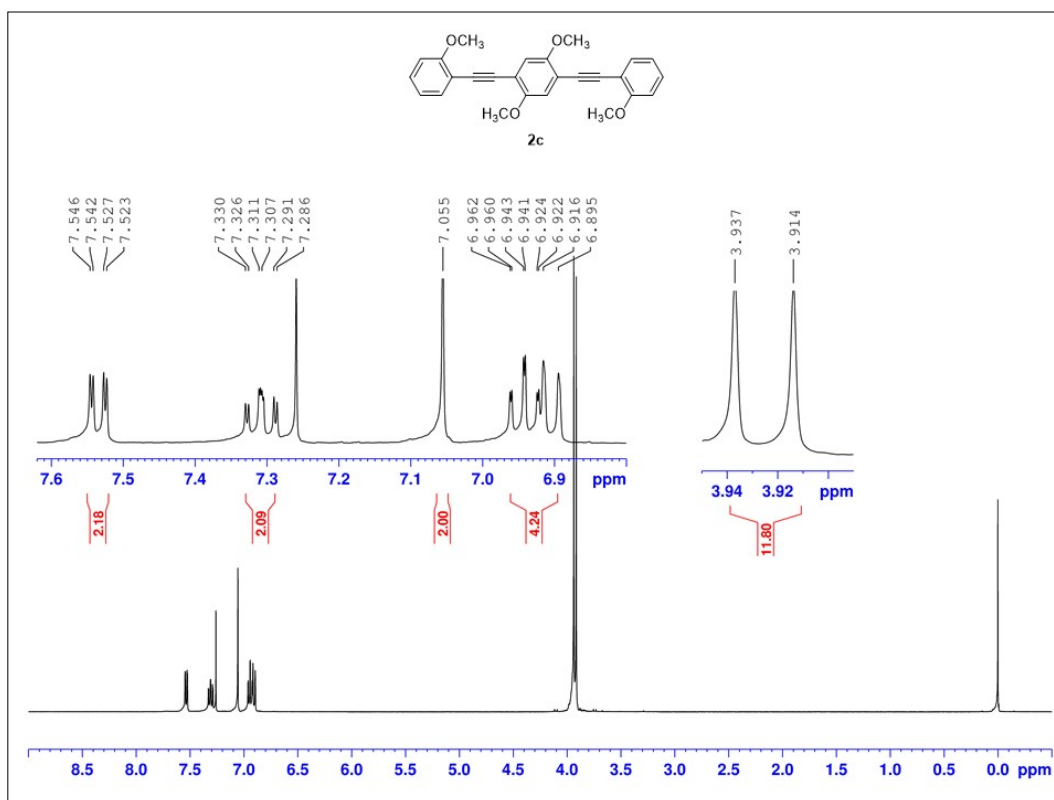

Figure S34:  $^1\text{H NMR}$  spectrum of compound **2c** in  $\text{CDCl}_3$ .

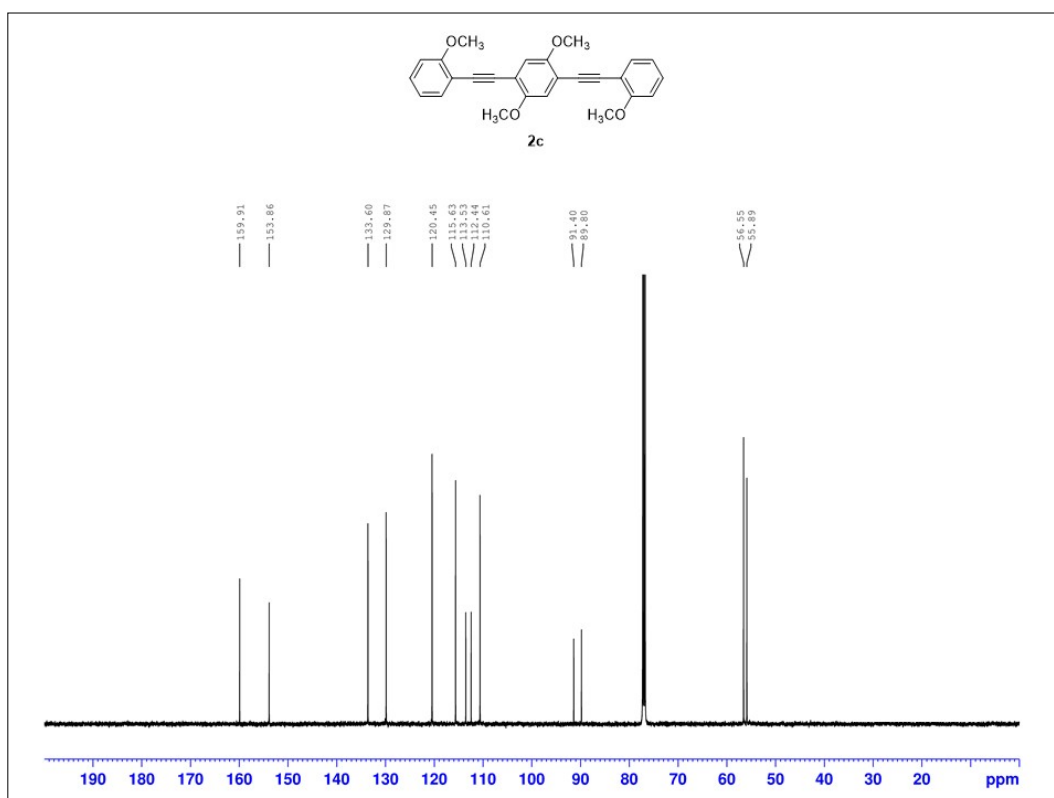

Figure S35:  $^{13}\text{C NMR}$  spectrum of compound **2c** in  $\text{CDCl}_3$ .

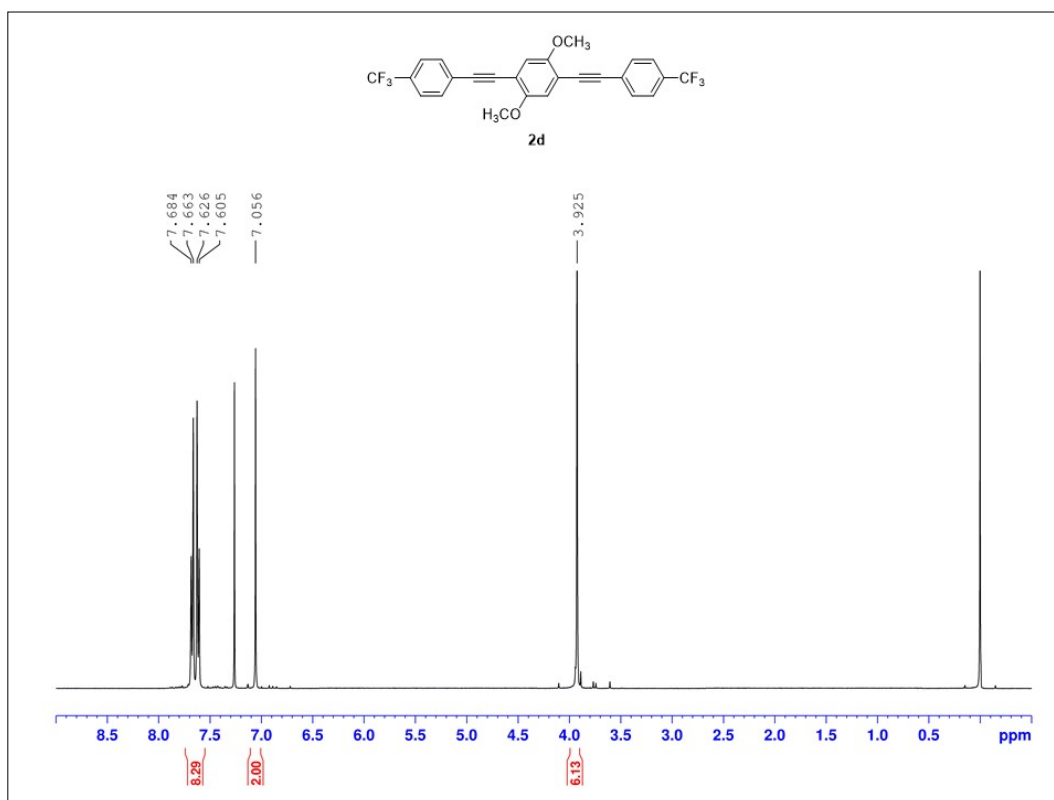

**Figure S36:** <sup>1</sup>H NMR spectrum of compound **2d** in CDCl<sub>3</sub>.

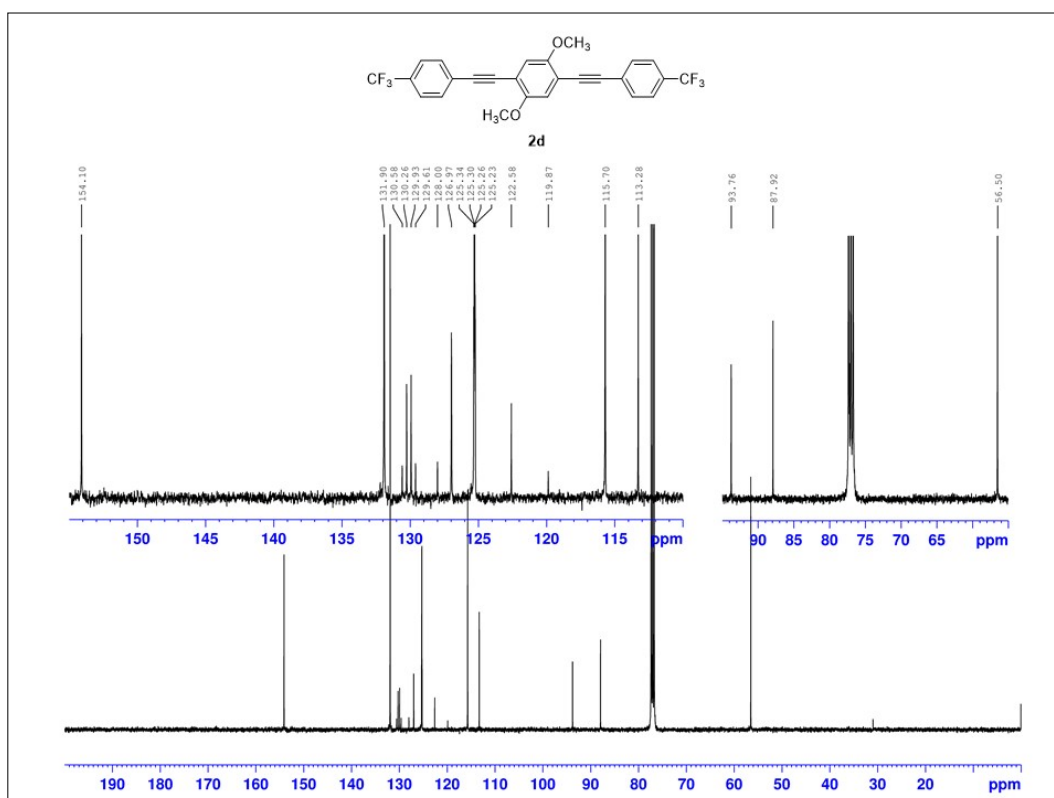

**Figure S37:** <sup>13</sup>C NMR spectrum of compound **2d** in CDCl<sub>3</sub>.

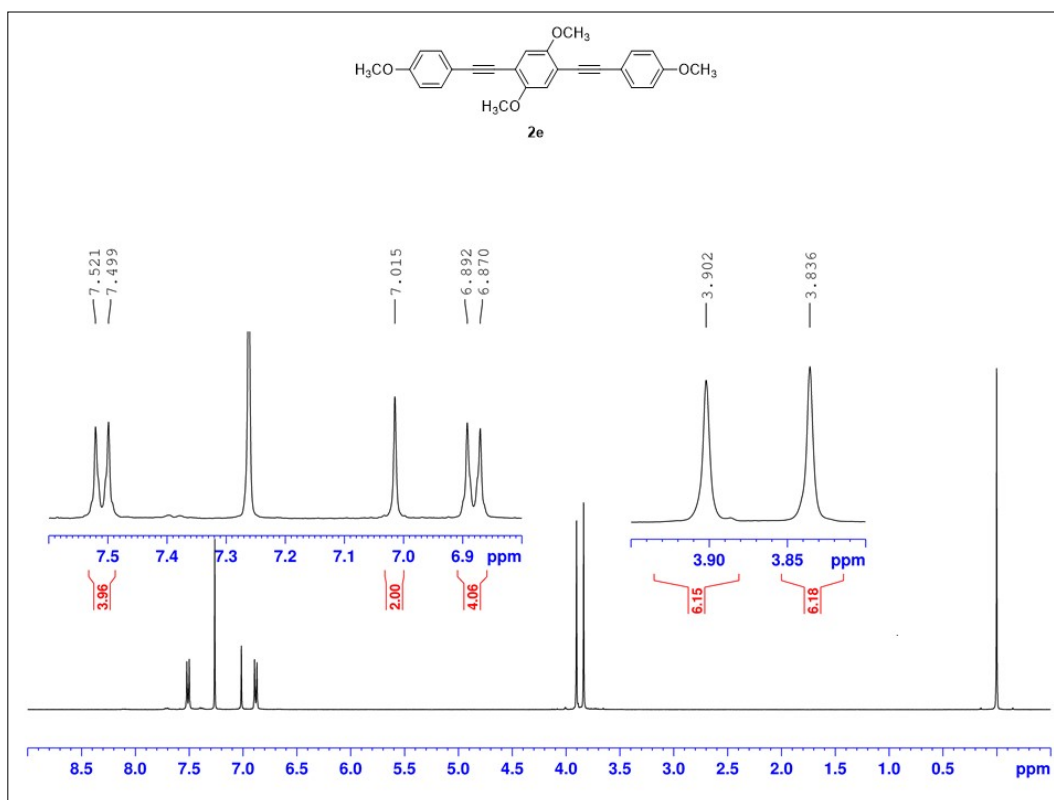

**Figure S38:** <sup>1</sup>H NMR spectrum of compound **2e** in CDCl<sub>3</sub>.

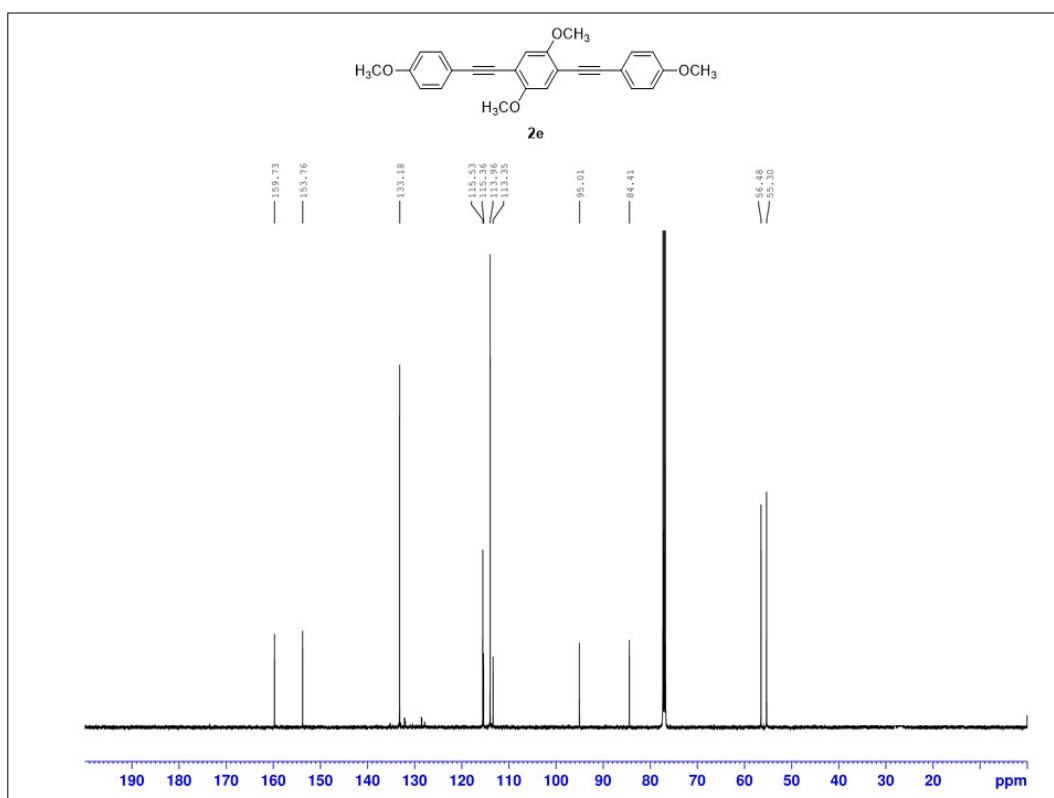

**Figure S39:** <sup>13</sup>C NMR spectrum of compound **2e** in CDCl<sub>3</sub>.

## 7. References

- (1) SAINT v8.37, Bruker-AXS (2016), APEX3 v2016.1.0. Madison, Wisconsin, USA.
- (2) L. Krause, R. Herbst-Irmer, G. M. Sheldrick, D. Stalke. *J. Appl. Cryst.* 2015, **48**, 3-10.
- (3) L. J. Farrugia. *J. Appl. Cryst.* 2012, **45**, 849-854
- (4) O. V. Dolomanov, L. J. Bourhis, R. J. Gildea, J. A. K. Howard, H. Puschmann. *J. Appl. Cryst.*, 2009, **42**, 339-341.
- (5) G. M. Sheldrick. SHELX-2014, Program for Crystal Structure Refinement, University of Göttingen, Göttingen, Germany, **2014**.
- (6) T. Devic, P. Horcajada, C. Serre, F. Salles, G. Maurin, B. Moulin, D. Heurtaux, G. Clet, A. Vimont, J.-M. Greneche. *J. Am. Chem. Soc.*, 2010, **132**, 1127-1136.
- (7) S. S. Zhu, T. M. Swager. *J. Am. Chem. Soc.*, 1997, **119**, 12568-12577.
- (8) M. J. Frisch et al., *Gaussian16, Revis. A.03, Gaussian Inc., Wallingford CT (full Ref. Support. Information)*.
- (9) R. G. Parr and W. Yang, *Density-Functional Theory of Atoms and Molecules*, Oxford, New York, **1989**
- (10) A. D. Becke, *J. Chem. Phys.*, 1993, **98**, 5648–5650
- (11) J. Tomasi, B. Mennucci and R. Cammi, *Chem. Rev.*, 2005, **105**, 2999–3093
